# Supplementary material
Source: PubMed Central journal article supplement (PMC3275799)
Supplement: Supp_Data.pdf [file Supp_Data.pdf]

## Supplementary Data

SUPPLEMENTARY TABLE S1. LIST OF GENES ASSOCIATED WITH CELL MOVEMENT

| <i>Gene name</i>    | <i>Description</i>                                                                                        | <i>cen3tel PD37<br/>versus PD15<br/>logFC</i> | <i>cen3tel PD97<br/>versus PD15<br/>logFC</i> | <i>cen3tel PD167<br/>versus PD15<br/>logFC</i> | <i>cen3tel PD618<br/>versus PD15<br/>logFC</i> | <i>cen3tel PD1034<br/>versus PD15<br/>logFC</i> |
|---------------------|-----------------------------------------------------------------------------------------------------------|-----------------------------------------------|-----------------------------------------------|------------------------------------------------|------------------------------------------------|-------------------------------------------------|
| IL12A               | interleukin 12A (natural killer cell stimulatory factor 1, cytotoxic lymphocyte maturation factor 1, p35) | -2.32                                         | -1.44                                         | -2.00                                          | -1.70                                          | -1.85                                           |
| ITGA6               | integrin, alpha 6                                                                                         | -2.20                                         | 1.29                                          | -0.31                                          | -0.95                                          | -0.36                                           |
| SPHK1               | sphingosine kinase 1                                                                                      | -2.21                                         | -0.46                                         | -1.47                                          | -0.76                                          | -1.22                                           |
| HBEGF               | heparin-binding EGF-like growth factor                                                                    | -2.08                                         | 0.39                                          | 0.36                                           | -0.08                                          | -0.97                                           |
| JAG1                | jagged 1 (Alagille syndrome)                                                                              | 1.06                                          | 2.10                                          | 0.40                                           | -0.65                                          | -0.90                                           |
| ITGB2               | integrin, beta 2 (complement component 3 receptor 3 and 4 subunit)                                        | 0.46                                          | 2.17                                          | 0.18                                           | 0.35                                           | -0.02                                           |
| JUB                 | jub, ajuba homolog ( <i>Xenopus laevis</i> )                                                              | 1.01                                          | 2.38                                          | 1.33                                           | 1.29                                           | 1.29                                            |
| NR4A2               | nuclear receptor subfamily 4, group A, member 2                                                           | -0.03                                         | 2.32                                          | 1.24                                           | 0.27                                           | -0.18                                           |
| FOXE1 <sup>a</sup>  | forkhead box E1 (thyroid transcription factor 2)                                                          | -0.09                                         | 2.33                                          | 1.66                                           | 0.25                                           | 0.40                                            |
| RELN                | reelin                                                                                                    | 2.35                                          | 2.10                                          | -0.03                                          | 0.98                                           | 0.14                                            |
| HDAC9               | histone deacetylase 9                                                                                     | 0.94                                          | 2.59                                          | 0.13                                           | 1.46                                           | 0.94                                            |
| CXCL10              | chemokine (C-X-C motif) ligand 10                                                                         | -0.65                                         | 2.37                                          | -0.04                                          | 1.93                                           | -0.41                                           |
| BDKRB1              | bradykinin receptor B1                                                                                    | -0.59                                         | -0.78                                         | -2.41                                          | -1.83                                          | -1.72                                           |
| ITGA2 <sup>a</sup>  | integrin, alpha 2 (CD49B, alpha 2 subunit of VLA-2 receptor)                                              | -2.97                                         | -2.77                                         | -3.01                                          | -0.16                                          | -0.28                                           |
| ITGA2 <sup>a</sup>  | integrin, alpha 2 (CD49B, alpha 2 subunit of VLA-2 receptor)                                              | -2.99                                         | -2.76                                         | -3.14                                          | 0.00                                           | -0.49                                           |
| FN1 <sup>a</sup>    | fibronectin 1                                                                                             | -0.51                                         | -1.60                                         | -2.03                                          | -1.29                                          | -1.54                                           |
| TGFB2               | transforming growth factor, beta 2                                                                        | -1.24                                         | 1.78                                          | 2.11                                           | -0.75                                          | -0.02                                           |
| FOXE1 <sup>a</sup>  | forkhead box E1 (thyroid transcription factor 2)                                                          | -0.14                                         | 2.81                                          | 2.09                                           | 0.40                                           | 0.58                                            |
| FN1 <sup>a</sup>    | fibronectin 1                                                                                             | 0.21                                          | -0.86                                         | -2.04                                          | -1.40                                          | -1.34                                           |
| TPM1 <sup>a</sup>   | tropomyosin 1 (alpha)                                                                                     | -0.45                                         | 0.11                                          | -2.15                                          | -2.84                                          | -1.85                                           |
| TIE1                | tyrosine kinase with immunoglobulin-like and EGF-like domains 1                                           | -0.02                                         | 0.00                                          | 0.03                                           | 2.35                                           | 1.59                                            |
| TPM1 <sup>a</sup>   | tropomyosin 1 (alpha)                                                                                     | -0.39                                         | 0.16                                          | -2.04                                          | -2.68                                          | -1.86                                           |
| VCAN                | versican                                                                                                  | -0.75                                         | -0.31                                         | -0.70                                          | -2.37                                          | -1.53                                           |
| MMP14               | matrix metalloproteinase 14 (membrane-inserted)                                                           | 0.46                                          | -0.74                                         | -2.35                                          | -2.73                                          | -1.54                                           |
| FGF2                | fibroblast growth factor 2 (basic)                                                                        | -0.78                                         | 0.39                                          | -2.78                                          | -2.41                                          | -2.00                                           |
| NEXN <sup>a</sup>   | nexilin (F actin binding protein)                                                                         | 1.57                                          | 2.15                                          | 2.01                                           | 1.62                                           | 2.48                                            |
| TEK                 | TEK tyrosine kinase, endothelial                                                                          | 0.88                                          | 3.33                                          | 2.38                                           | 2.99                                           | 3.81                                            |
| NF2 <sup>a</sup>    | neurofibromin 2 (merlin)                                                                                  | -1.35                                         | -1.55                                         | -1.15                                          | -1.86                                          | -2.63                                           |
| NF2 <sup>a</sup>    | neurofibromin 2 (merlin)                                                                                  | -1.14                                         | -1.42                                         | -1.22                                          | -2.14                                          | -2.32                                           |
| IGFBP3 <sup>a</sup> | insulin-like growth factor binding protein 3                                                              | -1.20                                         | -0.94                                         | -2.56                                          | -4.01                                          | -3.93                                           |
| NF2 <sup>a</sup>    | neurofibromin 2 (merlin)                                                                                  | -1.05                                         | -1.32                                         | -1.15                                          | -2.01                                          | -2.21                                           |
| TPM1 <sup>a</sup>   | tropomyosin 1 (alpha)                                                                                     | -0.84                                         | -0.99                                         | 0.65                                           | 1.18                                           | 2.00                                            |
| TPM1 <sup>a</sup>   | tropomyosin 1 (alpha)                                                                                     | -0.63                                         | 0.00                                          | -2.01                                          | -2.56                                          | -2.04                                           |
| IGFBP3 <sup>a</sup> | insulin-like growth factor binding protein 3                                                              | -0.86                                         | -0.84                                         | -3.68                                          | -4.87                                          | -4.36                                           |
| CITED2              | Cbp/p300-interacting transactivator, with Glu/Asp-rich carboxy-terminal domain, 2                         | -0.22                                         | 0.83                                          | -0.09                                          | -1.49                                          | -3.42                                           |

(continued)

SUPPLEMENTARY TABLE S1. (CONTINUED)

| <i>Gene name</i>     | <i>Description</i>                                                | <i>cen3tel PD37<br/>versus PD15<br/>logFC</i> | <i>cen3tel PD97<br/>versus PD15<br/>logFC</i> | <i>cen3tel PD167<br/>versus PD15<br/>logFC</i> | <i>cen3tel PD618<br/>versus PD15<br/>logFC</i> | <i>cen3tel PD1034<br/>versus PD15<br/>logFC</i> |
|----------------------|-------------------------------------------------------------------|-----------------------------------------------|-----------------------------------------------|------------------------------------------------|------------------------------------------------|-------------------------------------------------|
| SMAD7                | SMAD family member 7                                              | -1.41                                         | -1.02                                         | -1.72                                          | -1.27                                          | -2.37                                           |
| NEXN <sup>a</sup>    | nexilin (F actin binding protein)                                 | 1.44                                          | 2.02                                          | 1.79                                           | 1.54                                           | 2.24                                            |
| IGFBP5               | insulin-like growth factor binding protein 5                      | -1.45                                         | -0.73                                         | 0.13                                           | -4.34                                          | -5.18                                           |
| TPM1 <sup>a</sup>    | tropomyosin 1 (alpha)                                             | -0.54                                         | 0.03                                          | -2.01                                          | -2.75                                          | -2.21                                           |
| HMOX1                | heme oxygenase (decycling) 1                                      | -3.06                                         | -3.57                                         | -2.95                                          | -2.66                                          | -3.16                                           |
| LAMA4                | laminin, alpha 4                                                  | 1.22                                          | 0.19                                          | -2.69                                          | -2.49                                          | -3.93                                           |
| ABHD2                | abhydrolase domain containing 2                                   | -0.44                                         | -0.15                                         | -1.68                                          | -1.80                                          | -2.19                                           |
| CHRD                 | chordin                                                           | -0.30                                         | -0.95                                         | -1.52                                          | -1.57                                          | -2.06                                           |
| ADA                  | adenosine deaminase                                               | -1.84                                         | -2.08                                         | -2.35                                          | -2.44                                          | -2.31                                           |
| PDGFA                | platelet-derived growth factor alpha polypeptide                  | -0.91                                         | -0.96                                         | -2.08                                          | -1.93                                          | -2.25                                           |
| COL18A1 <sup>a</sup> | collagen, type XVIII, alpha 1                                     | 0.67                                          | -2.26                                         | -3.08                                          | -3.29                                          | -3.96                                           |
| COL18A1 <sup>a</sup> | collagen, type XVIII, alpha 1                                     | 0.11                                          | -1.17                                         | -1.16                                          | -1.21                                          | -2.09                                           |
| F10                  | coagulation factor X                                              | -0.41                                         | -1.10                                         | -1.49                                          | -1.25                                          | -2.07                                           |
| VEGFA                | vascular endothelial growth factor A                              | -1.06                                         | 0.91                                          | -0.68                                          | 0.23                                           | 2.05                                            |
| PDPN <sup>a</sup>    | podoplanin                                                        | -1.02                                         | -1.38                                         | -2.57                                          | -5.00                                          | -5.71                                           |
| F2R                  | coagulation factor II (thrombin) receptor                         | -0.30                                         | 1.57                                          | 1.18                                           | 2.05                                           | 2.04                                            |
| FURIN                | furin (paired basic amino acid cleaving enzyme)                   | -0.87                                         | -0.91                                         | -2.14                                          | -2.00                                          | -3.00                                           |
| LYN                  | v-yes-1 Yamaguchi sarcoma viral related oncogene homolog          | -0.11                                         | -1.24                                         | -2.22                                          | -2.19                                          | -2.65                                           |
| S1PR1                | sphingosine-1-phosphate receptor 1                                | -1.22                                         | -0.62                                         | -0.07                                          | -1.76                                          | -3.10                                           |
| CHST3                | carbohydrate (chondroitin 6) sulfotransferase 3                   | -0.50                                         | 0.15                                          | -0.36                                          | -1.32                                          | -2.12                                           |
| IGF2                 | insulin-like growth factor 2 (somatomedin A)                      | -2.16                                         | -3.41                                         | -3.67                                          | -3.72                                          | -4.21                                           |
| PRR5                 | proline rich 5 (renal)                                            | -0.13                                         | -0.70                                         | -1.47                                          | -1.73                                          | -2.09                                           |
| F3                   | coagulation factor III (thromboplastin, tissue factor)            | -1.20                                         | 1.76                                          | -0.19                                          | -2.25                                          | -2.17                                           |
| ERBB4                | v-erb-a erythroblastic leukemia viral oncogene homolog 4 (avian)  | -0.06                                         | -0.06                                         | -0.01                                          | 1.21                                           | 2.61                                            |
| PDPN <sup>a</sup>    | podoplanin                                                        | -1.17                                         | -1.39                                         | -2.28                                          | -3.59                                          | -4.62                                           |
| CCK                  | cholecystokinin                                                   | -1.86                                         | -1.42                                         | -1.90                                          | -1.73                                          | -2.61                                           |
| LAMC1                | laminin, gamma 1 (formerly LAMB2)                                 | 1.41                                          | 0.67                                          | -0.84                                          | -1.84                                          | -2.07                                           |
| WNT2                 | wingless-type MMTV integration site family member 2               | -0.59                                         | 0.06                                          | -1.43                                          | -2.31                                          | -2.75                                           |
| DNER                 | delta/notch-like EGF repeat containing                            | -0.24                                         | 0.39                                          | 1.77                                           | 3.30                                           | 3.93                                            |
| IL8                  | interleukin 8                                                     | -5.30                                         | 2.92                                          | -4.91                                          | -3.01                                          | -3.77                                           |
| GDNF                 | glial cell derived neurotrophic factor                            | -1.38                                         | -0.54                                         | -0.07                                          | -0.92                                          | -2.00                                           |
| TWIST1 <sup>a</sup>  | twist homolog 1 ( <i>Drosophila</i> )                             | 0.04                                          | -0.43                                         | -0.12                                          | -0.75                                          | -2.56                                           |
| SCARB1               | scavenger receptor class B, member 1                              | -0.61                                         | 0.18                                          | -1.23                                          | -1.40                                          | -2.62                                           |
| KITLG                | KIT ligand                                                        | -1.18                                         | 0.32                                          | -0.87                                          | -1.53                                          | -2.19                                           |
| CXCL12 <sup>a</sup>  | chemokine (C-X-C motif) ligand 12 (stromal cell-derived factor 1) | -1.48                                         | -3.38                                         | -0.24                                          | -2.16                                          | -3.29                                           |
| KIT                  | v-kit Hardy-Zuckerman 4 feline sarcoma viral oncogene homolog     | 1.37                                          | 1.01                                          | 2.25                                           | -1.14                                          | -2.71                                           |
| MET                  | met proto-oncogene (hepatocyte growth factor receptor)            | 0.08                                          | 0.51                                          | -0.03                                          | -0.08                                          | 2.03                                            |
| CLASP2               | cytoplasmic linker associated protein 2                           | 0.32                                          | 0.39                                          | 0.43                                           | 1.51                                           | 2.46                                            |
| TNS3                 | tensin 3                                                          | 1.64                                          | -1.09                                         | -4.45                                          | -2.86                                          | -3.16                                           |
| NTN1                 | netrin 1                                                          | 0.09                                          | -2.34                                         | -2.75                                          | -2.86                                          | -3.10                                           |
| CXCL3 <sup>a</sup>   | chemokine (C-X-C motif) ligand 3                                  | -4.85                                         | 0.99                                          | -4.31                                          | -2.35                                          | -3.95                                           |
| ICAM1                | intercellular adhesion molecule 1                                 | -1.09                                         | 0.51                                          | -2.29                                          | -2.09                                          | -2.85                                           |

(continued)

SUPPLEMENTARY TABLE S1. (CONTINUED)

| <i>Gene name</i>    | <i>Description</i>                                                            | <i>cen3tel PD37<br/>versus PD15<br/>logFC</i> | <i>cen3tel PD97<br/>versus PD15<br/>logFC</i> | <i>cen3tel PD167<br/>versus PD15<br/>logFC</i> | <i>cen3tel PD618<br/>versus PD15<br/>logFC</i> | <i>cen3tel PD1034<br/>versus PD15<br/>logFC</i> |
|---------------------|-------------------------------------------------------------------------------|-----------------------------------------------|-----------------------------------------------|------------------------------------------------|------------------------------------------------|-------------------------------------------------|
| ID1                 | inhibitor of DNA binding 1,<br>dominant negative helix-loop-<br>helix protein | -1.69                                         | -2.43                                         | -2.64                                          | -2.58                                          | -3.73                                           |
| IL6                 | interleukin 6 (interferon, beta 2)                                            | 0.13                                          | 3.73                                          | 0.02                                           | -0.83                                          | -2.59                                           |
| TWIST1 <sup>a</sup> | twist homolog 1 ( <i>Drosophila</i> )                                         | 0.17                                          | -0.41                                         | -0.03                                          | -0.51                                          | -2.31                                           |
| COL5A1 <sup>a</sup> | collagen, type V, alpha 1                                                     | 1.19                                          | 0.37                                          | -1.88                                          | -2.52                                          | -3.19                                           |
| AMOT                | angiominin                                                                    | 1.67                                          | 2.64                                          | 3.86                                           | 3.00                                           | 2.61                                            |
| B4GALT1             | UDP-Gal:betaGlcNAc beta 1,4-<br>galactosyltransferase, polypeptide 1          | -0.52                                         | -0.39                                         | -1.40                                          | -1.64                                          | -2.80                                           |
| THBS4               | thrombospondin 4                                                              | 0.09                                          | -1.91                                         | -2.12                                          | -1.98                                          | -2.32                                           |
| THBS1 <sup>a</sup>  | thrombospondin 1                                                              | 0.79                                          | 0.14                                          | -2.31                                          | -2.74                                          | -2.85                                           |
| CAV2                | caveolin 2                                                                    | -0.91                                         | -0.55                                         | -2.97                                          | -2.86                                          | -3.21                                           |
| IL6R                | interleukin 6 receptor                                                        | 0.49                                          | -0.22                                         | -1.01                                          | -1.11                                          | -2.29                                           |
| CCL2                | chemokine (C-C motif) ligand 2                                                | 0.78                                          | 2.55                                          | -1.39                                          | -2.94                                          | -3.73                                           |
| CXCL12 <sup>a</sup> | chemokine (C-X-C motif) ligand 12<br>(stromal cell-derived factor 1)          | -1.53                                         | -4.57                                         | -1.78                                          | -3.78                                          | -6.05                                           |
| PPAP2B              | phosphatidic acid phosphatase<br>type 2B                                      | 0.12                                          | -0.75                                         | -2.02                                          | -4.64                                          | -4.56                                           |
| PDGFRB              | platelet-derived growth factor<br>receptor, beta polypeptide                  | 0.48                                          | -1.53                                         | -3.78                                          | -4.45                                          | -4.59                                           |
| DCLK1               | doublecortin-like kinase 1                                                    | 0.61                                          | -1.46                                         | -1.64                                          | -1.58                                          | -2.38                                           |
| NDN                 | necdin homolog (mouse)                                                        | 0.59                                          | -4.85                                         | -4.72                                          | -4.75                                          | -5.27                                           |
| NRCAM               | neuronal cell adhesion molecule                                               | -0.12                                         | -0.95                                         | -1.27                                          | -1.20                                          | -2.10                                           |
| TGFBR3              | transforming growth factor, beta<br>receptor III                              | 0.19                                          | 0.53                                          | -0.24                                          | -1.35                                          | -2.15                                           |
| THBS1 <sup>a</sup>  | thrombospondin 1                                                              | 1.21                                          | -0.09                                         | -3.01                                          | -3.26                                          | -3.08                                           |
| PLAT                | plasminogen activator, tissue                                                 | -2.78                                         | -0.33                                         | -3.67                                          | -3.98                                          | -3.77                                           |
| CTHRC1              | collagen triple helix repeat<br>containing 1                                  | -0.81                                         | -3.67                                         | -3.85                                          | -3.79                                          | -4.10                                           |
| CTGF                | connective tissue growth factor                                               | -0.91                                         | -1.26                                         | -2.58                                          | -3.71                                          | -4.22                                           |
| COL5A1 <sup>a</sup> | collagen, type V, alpha 1                                                     | 1.20                                          | 0.40                                          | -1.85                                          | -2.49                                          | -2.99                                           |
| NRP1                | neuropilin 1                                                                  | -0.27                                         | -1.22                                         | -1.73                                          | -1.80                                          | -2.09                                           |
| EMX2                | empty spiracles homeobox 2                                                    | 0.60                                          | -1.32                                         | -3.58                                          | -3.90                                          | -4.43                                           |
| RPS6KB1             | ribosomal protein S6 kinase, 70kDa,<br>polypeptide 1                          | 0.80                                          | 0.99                                          | 0.62                                           | 0.98                                           | 2.10                                            |
| ACVRL1              | activin A receptor type II-like 1                                             | 0.46                                          | -0.32                                         | -2.30                                          | -2.07                                          | -2.37                                           |
| PODXL               | podocalyxin-like                                                              | -3.13                                         | -0.31                                         | -3.38                                          | -3.34                                          | -4.39                                           |
| ENG                 | endoglin                                                                      | -0.26                                         | -0.49                                         | -1.79                                          | -2.12                                          | -2.73                                           |
| VEGFC               | vascular endothelial growth factor C                                          | -2.66                                         | -0.07                                         | -1.99                                          | -2.10                                          | -2.52                                           |
| ARID5B              | AT rich interactive domain 5B<br>(MRF1-like)                                  | 0.61                                          | 0.48                                          | 0.33                                           | -1.71                                          | -2.73                                           |
| CCL5                | chemokine (C-C motif) ligand 5                                                | -3.11                                         | -1.03                                         | -3.84                                          | -3.49                                          | -4.79                                           |
| CXCL3 <sup>a</sup>  | chemokine (C-X-C motif) ligand 3                                              | -1.86                                         | 0.81                                          | -2.63                                          | -1.74                                          | -3.06                                           |

<sup>a</sup>Genes with more than one probe on the array.

SUPPLEMENTARY TABLE S2. LIST OF GENES INVOLVED INTO PROTEINACEOUS EXTRACELLULAR MATRIX

| <i>Gene name</i>    | <i>Description</i>                                                                            | <i>cen3tel PD37<br/>versus PD15<br/>logFC</i> | <i>cen3tel PD97<br/>versus PD15<br/>logFC</i> | <i>cen3tel PD167<br/>versus PD15<br/>logFC</i> | <i>cen3tel PD618<br/>versus PD15<br/>logFC</i> | <i>cen3tel PD1034<br/>versus PD15<br/>logFC</i> |
|---------------------|-----------------------------------------------------------------------------------------------|-----------------------------------------------|-----------------------------------------------|------------------------------------------------|------------------------------------------------|-------------------------------------------------|
| MMP12 <sup>a</sup>  | matrix metallopeptidase 12<br>(macrophage elastase)                                           | -4.11                                         | -4.05                                         | -5.77                                          | -5.75                                          | -5.99                                           |
| MMP12 <sup>a</sup>  | matrix metallopeptidase 12<br>(macrophage elastase)                                           | -4.03                                         | -3.90                                         | -5.33                                          | -5.35                                          | -5.89                                           |
| SMOC2               | SPARC related modular calcium<br>binding 2                                                    | -0.19                                         | -4.56                                         | -5.45                                          | -5.34                                          | -5.85                                           |
| SPON1               | spondin 1, extracellular matrix<br>protein                                                    | -2.16                                         | -4.60                                         | -4.52                                          | -4.50                                          | -5.28                                           |
| MFAP4               | microfibrillar-associated protein 4                                                           | -0.76                                         | -3.65                                         | -4.75                                          | -4.81                                          | -5.37                                           |
| DPT                 | dermatopontin                                                                                 | 0.33                                          | -2.72                                         | -5.50                                          | -5.41                                          | -5.78                                           |
| FMOD                | fibromodulin                                                                                  | -0.09                                         | -3.16                                         | -5.06                                          | -5.03                                          | -5.55                                           |
| SPON2               | spondin 2, extracellular matrix<br>protein                                                    | 0.07                                          | -4.66                                         | -4.26                                          | -4.44                                          | -4.85                                           |
| FBLN1 <sup>a</sup>  | fibulin 1                                                                                     | -0.52                                         | -1.84                                         | -4.65                                          | -5.26                                          | -5.74                                           |
| TFPI2               | tissue factor pathway inhibitor 2                                                             | -3.05                                         | -1.27                                         | -4.52                                          | -3.53                                          | -5.57                                           |
| MMP1                | matrix metallopeptidase 1<br>(interstitial collagenase)                                       | -1.18                                         | -3.76                                         | -4.37                                          | -4.08                                          | -4.37                                           |
| POSTN               | periostin, osteoblast specific factor                                                         | -0.26                                         | -2.23                                         | -5.89                                          | -5.84                                          | -2.80                                           |
| CTHRC1              | collagen triple helix repeat<br>containing 1                                                  | -0.81                                         | -3.67                                         | -3.85                                          | -3.79                                          | -4.10                                           |
| EMILIN2             | elastin microfibril interfacier 2                                                             | 0.11                                          | -2.79                                         | -4.17                                          | -4.17                                          | -4.69                                           |
| FBLN2               | fibulin 2                                                                                     | 0.14                                          | -2.13                                         | -3.49                                          | -4.10                                          | -4.58                                           |
| EGFL6               | EGF-like-domain, multiple 6                                                                   | -0.17                                         | -2.85                                         | -3.52                                          | -3.36                                          | -4.02                                           |
| FBLN1 <sup>a</sup>  | fibulin 1                                                                                     | -0.45                                         | -1.56                                         | -3.50                                          | -3.88                                          | -4.35                                           |
| MMP3                | matrix metallopeptidase 3<br>(stromelysin 1, progelatinase)                                   | -1.24                                         | -2.85                                         | -3.51                                          | -2.94                                          | -2.85                                           |
| MMP10               | matrix metallopeptidase 10<br>(stromelysin 2)                                                 | -2.19                                         | -1.77                                         | -2.95                                          | -2.77                                          | -3.46                                           |
| PRELP               | proline/arginine-rich end leucine-<br>rich repeat protein                                     | -0.89                                         | -1.25                                         | -3.19                                          | -3.27                                          | -4.41                                           |
| CTGF                | connective tissue growth factor                                                               | -0.91                                         | -1.26                                         | -2.58                                          | -3.71                                          | -4.22                                           |
| SFRP1               | secreted frizzled-related protein 1                                                           | 0.12                                          | -2.53                                         | -1.69                                          | -3.69                                          | -4.80                                           |
| SFRP1               | secreted frizzled-related protein 1                                                           | 0.14                                          | -2.65                                         | -1.65                                          | -3.79                                          | -4.63                                           |
| DCN                 | decorin                                                                                       | -0.25                                         | -0.82                                         | -2.31                                          | -4.38                                          | -4.79                                           |
| TIMP3               | TIMP metallopeptidase inhibitor 3                                                             | -1.02                                         | 0.96                                          | -2.87                                          | -4.36                                          | -5.08                                           |
| COMP                | cartilage oligomeric matrix protein                                                           | 0.31                                          | -2.96                                         | -3.03                                          | -2.91                                          | -3.64                                           |
| ELN <sup>a</sup>    | elastin                                                                                       | 0.26                                          | -0.96                                         | -3.37                                          | -3.67                                          | -4.25                                           |
| COL18A1             | collagen, type XVIII, alpha 1                                                                 | 0.67                                          | -2.26                                         | -3.08                                          | -3.29                                          | -3.96                                           |
| LTBP2 <sup>a</sup>  | latent transforming growth factor<br>beta binding protein 2                                   | 0.43                                          | -1.58                                         | -3.10                                          | -3.49                                          | -4.01                                           |
| ELN <sup>a</sup>    | elastin                                                                                       | -0.53                                         | -1.40                                         | -2.95                                          | -3.07                                          | -3.75                                           |
| TNFRSF11B           | tumor necrosis factor receptor<br>superfamily, member 11b                                     | 0.49                                          | -0.83                                         | -2.38                                          | -4.26                                          | -4.51                                           |
| LUM                 | lumican                                                                                       | 0.11                                          | 0.26                                          | -2.41                                          | -4.45                                          | -4.59                                           |
| FBLN5               | fibulin 5                                                                                     | 0.36                                          | -1.27                                         | -2.81                                          | -3.21                                          | -4.07                                           |
| NTN1                | netrin 1                                                                                      | 0.09                                          | -2.34                                         | -2.75                                          | -2.86                                          | -3.10                                           |
| MMP2                | matrix metallopeptidase 2<br>(gelatinase A, 72 kDa gelatinase,<br>72 kDa type IV collagenase) | 0.27                                          | -2.20                                         | -2.96                                          | -2.15                                          | -3.81                                           |
| FBLN5               | fibulin 5                                                                                     | 0.30                                          | -1.23                                         | -2.64                                          | -3.04                                          | -4.04                                           |
| COL6A2              | collagen, type VI, alpha 2                                                                    | -0.52                                         | -0.27                                         | -3.08                                          | -2.67                                          | -4.08                                           |
| TNFRSF11B           | tumor necrosis factor receptor<br>superfamily, member 11b                                     | 0.46                                          | -0.85                                         | -2.16                                          | -3.68                                          | -4.13                                           |
| TFPI2               | tissue factor pathway inhibitor 2                                                             | -2.34                                         | -0.35                                         | -2.43                                          | -2.24                                          | -2.93                                           |
| COMP                | cartilage oligomeric matrix protein                                                           | 0.26                                          | -2.32                                         | -2.46                                          | -2.47                                          | -3.20                                           |
| DPT                 | dermatopontin                                                                                 | -0.04                                         | -1.70                                         | -2.49                                          | -2.63                                          | -3.27                                           |
| COL8A2              | collagen, type VIII, alpha 2                                                                  | -0.68                                         | -0.10                                         | -2.80                                          | -2.79                                          | -3.16                                           |
| COL6A2              | collagen, type VI, alpha 2                                                                    | -1.16                                         | -0.66                                         | -2.19                                          | -2.92                                          | -2.56                                           |
| COL3A1 <sup>a</sup> | collagen, type III, alpha 1                                                                   | 1.10                                          | -1.05                                         | -2.12                                          | -3.69                                          | -3.68                                           |
| COL13A1             | collagen, type XIII, alpha 1                                                                  | -0.57                                         | -1.26                                         | -1.62                                          | -2.26                                          | -3.46                                           |

(continued)

SUPPLEMENTARY TABLE S2. (CONTINUED)

| <i>Gene name</i>    | <i>Description</i>                                                          | <i>cen3tel PD37<br/>versus PD15<br/>logFC</i> | <i>cen3tel PD97<br/>versus PD15<br/>logFC</i> | <i>cen3tel PD167<br/>versus PD15<br/>logFC</i> | <i>cen3tel PD618<br/>versus PD15<br/>logFC</i> | <i>cen3tel PD1034<br/>versus PD15<br/>logFC</i> |
|---------------------|-----------------------------------------------------------------------------|-----------------------------------------------|-----------------------------------------------|------------------------------------------------|------------------------------------------------|-------------------------------------------------|
| VIT                 | vitron                                                                      | 0.71                                          | -1.04                                         | -1.52                                          | -3.30                                          | -3.89                                           |
| ECM2                | extracellular matrix protein 2,<br>female organ and adipocyte<br>specific   | -0.27                                         | -1.33                                         | -2.62                                          | -2.32                                          | -2.39                                           |
| LTBP2 <sup>a</sup>  | latent transforming growth factor<br>beta binding protein 2                 | 0.63                                          | -0.93                                         | -2.79                                          | -2.65                                          | -3.04                                           |
| MMP27               | matrix metalloproteinase 27                                                 | -0.20                                         | -1.89                                         | -2.01                                          | -1.99                                          | -2.53                                           |
| THBS4               | thrombospondin 4                                                            | 0.09                                          | -1.91                                         | -2.12                                          | -1.98                                          | -2.32                                           |
| CILP                | cartilage intermediate layer protein,<br>nucleotide<br>pyrophosphohydrolase | -1.38                                         | -1.28                                         | -1.62                                          | -1.50                                          | -2.26                                           |
| COL13A1             | collagen, type XIII, alpha 1                                                | -0.44                                         | -1.12                                         | -1.25                                          | -2.06                                          | -3.01                                           |
| LTBP2 <sup>a</sup>  | latent transforming growth factor<br>beta binding protein 2                 | 0.54                                          | -1.06                                         | -1.89                                          | -2.25                                          | -3.13                                           |
| LAMA4               | laminin, alpha 4                                                            | 1.22                                          | 0.19                                          | -2.69                                          | -2.49                                          | -3.93                                           |
| EFEMP2              | EGF-containing fibulin-like<br>extracellular matrix protein 2               | 0.22                                          | -0.47                                         | -1.97                                          | -2.44                                          | -3.00                                           |
| COL1A2              | collagen, type I, alpha 2                                                   | -0.26                                         | -1.48                                         | -1.91                                          | -2.20                                          | -1.69                                           |
| TGFBI               | transforming growth factor, beta-<br>induced, 68 kDa                        | 0.45                                          | 0.60                                          | -2.82                                          | -3.06                                          | -2.65                                           |
| MFAP2               | microfibrillar-associated protein 2                                         | 1.13                                          | -0.10                                         | -2.23                                          | -2.67                                          | -3.61                                           |
| TIMP2               | TIMP metalloproteinase inhibitor 2                                          | 0.04                                          | -0.91                                         | -1.52                                          | -2.05                                          | -3.00                                           |
| MMP19               | matrix metalloproteinase 19                                                 | -0.55                                         | 0.27                                          | -2.42                                          | -2.22                                          | -2.44                                           |
| WNT5B               | wingless-type MMTV integration<br>site family, member 5B                    | -1.70                                         | -1.14                                         | -1.24                                          | -1.28                                          | -1.96                                           |
| LTBP2 <sup>a</sup>  | latent transforming growth factor<br>beta binding protein 2                 | 0.57                                          | -0.81                                         | -2.20                                          | -2.18                                          | -2.58                                           |
| TNC                 | tenascin C                                                                  | -0.05                                         | -0.17                                         | -2.14                                          | -2.17                                          | -2.60                                           |
| WNT2                | wingless-type MMTV integration<br>site family member 2                      | -0.59                                         | 0.06                                          | -1.43                                          | -2.31                                          | -2.75                                           |
| TIMP1               | TIMP metalloproteinase inhibitor 1                                          | -0.05                                         | -0.61                                         | -2.05                                          | -2.03                                          | -2.26                                           |
| NPNT                | nephronectin                                                                | -0.47                                         | -1.55                                         | -1.45                                          | -1.45                                          | -2.08                                           |
| FN1                 | fibronectin 1                                                               | -0.51                                         | -1.60                                         | -2.03                                          | -1.29                                          | -1.54                                           |
| NID1                | nidogen 1                                                                   | -0.12                                         | -0.80                                         | -0.95                                          | -1.83                                          | -2.99                                           |
| ANGPTL4             | angiopoietin-like 4                                                         | -1.40                                         | -0.76                                         | -1.50                                          | -1.04                                          | -1.93                                           |
| HMCN1               | hemicentin 1                                                                | 0.55                                          | -0.96                                         | -2.01                                          | -1.90                                          | -2.12                                           |
| ADAMTS4             | ADAM metalloproteinase with<br>thrombospondin type 1 motif, 4               | -0.60                                         | -1.07                                         | -1.69                                          | -1.21                                          | -1.81                                           |
| LGALS3              | lectin, galactoside-binding, soluble, 3                                     | 0.04                                          | 0.51                                          | -1.73                                          | -2.20                                          | -2.78                                           |
| COL3A1 <sup>a</sup> | collagen, type III, alpha 1                                                 | 1.73                                          | -0.61                                         | -1.45                                          | -3.17                                          | -2.53                                           |
| COL5A1              | collagen, type V, alpha 1                                                   | 1.19                                          | 0.37                                          | -1.88                                          | -2.52                                          | -3.19                                           |
| COL6A1              | collagen, type VI, alpha 1                                                  | -0.34                                         | -0.10                                         | -2.12                                          | -1.92                                          | -1.49                                           |
| GPC1                | glypican 1                                                                  | 0.07                                          | -0.82                                         | -1.15                                          | -1.40                                          | -2.60                                           |
| COL5A1              | collagen, type V, alpha 1                                                   | 1.20                                          | 0.40                                          | -1.85                                          | -2.49                                          | -2.99                                           |
| VCAN                | versican                                                                    | -0.75                                         | -0.31                                         | -0.70                                          | -2.37                                          | -1.53                                           |
| ECM1                | extracellular matrix protein 1                                              | -0.14                                         | 0.39                                          | -1.40                                          | -1.60                                          | -2.86                                           |
| LTBP4               | latent transforming growth factor<br>beta binding protein 4                 | -0.63                                         | -0.57                                         | -1.25                                          | -1.50                                          | -1.63                                           |
| COL18A1             | collagen, type XVIII, alpha 1                                               | 0.11                                          | -1.17                                         | -1.16                                          | -1.21                                          | -2.09                                           |
| FN1                 | fibronectin 1                                                               | 0.21                                          | -0.86                                         | -2.04                                          | -1.40                                          | -1.34                                           |
| CPZ                 | carboxypeptidase Z                                                          | 0.59                                          | -0.07                                         | -1.32                                          | -1.88                                          | -2.68                                           |
| ADAMTS14            | ADAM metalloproteinase with<br>thrombospondin type 1 motif, 14              | 0.29                                          | -0.59                                         | -1.23                                          | -1.78                                          | -1.94                                           |
| ACHE                | acetylcholinesterase (Yt blood<br>group)                                    | -0.31                                         | -1.22                                         | -1.30                                          | -1.39                                          | -0.89                                           |
| COL1A1              | collagen, type I, alpha 1                                                   | 1.13                                          | -0.88                                         | -0.66                                          | -1.95                                          | -2.75                                           |
| SPARC               | secreted protein, acidic, cysteine-rich<br>(osteonectin)                    | 0.47                                          | -0.27                                         | -0.81                                          | -2.23                                          | -2.21                                           |
| COL5A2              | collagen, type V, alpha 2                                                   | 0.77                                          | -0.88                                         | -0.46                                          | -1.99                                          | -2.31                                           |
| CST3                | cystatin C                                                                  | -0.10                                         | -0.28                                         | -0.89                                          | -1.42                                          | -2.17                                           |

(continued)

SUPPLEMENTARY TABLE S2. (CONTINUED)

| <i>Gene name</i>   | <i>Description</i>                                                                       | <i>cen3tel PD37<br/>versus PD15<br/>logFC</i> | <i>cen3tel PD97<br/>versus PD15<br/>logFC</i> | <i>cen3tel PD167<br/>versus PD15<br/>logFC</i> | <i>cen3tel PD618<br/>versus PD15<br/>logFC</i> | <i>cen3tel PD1034<br/>versus PD15<br/>logFC</i> |
|--------------------|------------------------------------------------------------------------------------------|-----------------------------------------------|-----------------------------------------------|------------------------------------------------|------------------------------------------------|-------------------------------------------------|
| ADAMTS2            | ADAM metalloproteinase with thrombospondin type 1 motif, 2                               | -0.04                                         | -0.50                                         | -0.95                                          | -1.45                                          | -1.82                                           |
| COL1A2             | collagen, type I, alpha 2                                                                | 1.00                                          | -0.81                                         | -1.33                                          | -2.08                                          | -1.40                                           |
| COL6A3             | collagen, type VI, alpha 3                                                               | 0.36                                          | -0.07                                         | -1.48                                          | -1.35                                          | -1.91                                           |
| CCDC80             | coiled-coil domain containing 80                                                         | 0.41                                          | 0.04                                          | -1.09                                          | -2.05                                          | -1.72                                           |
| ADAMTS2            | ADAM metalloproteinase with thrombospondin type 1 motif, 2                               | -0.25                                         | -0.73                                         | -0.78                                          | -0.96                                          | -1.66                                           |
| LAMB2              | laminin, beta 2 (laminin S)                                                              | 0.13                                          | -0.25                                         | -0.82                                          | -1.46                                          | -1.89                                           |
| ZP3                | zona pellucida glycoprotein 3 (sperm receptor)                                           | -0.41                                         | 0.03                                          | -0.88                                          | -0.97                                          | -2.03                                           |
| RELL2              | RELT-like 2                                                                              | -0.39                                         | -0.71                                         | -0.74                                          | -0.63                                          | -1.69                                           |
| LOX                | lysyl oxidase                                                                            | 0.40                                          | 0.51                                          | -0.71                                          | -2.54                                          | -1.74                                           |
| MMP19              | matrix metalloproteinase 19                                                              | -0.32                                         | -0.08                                         | -0.98                                          | -1.10                                          | -1.59                                           |
| EMILIN1            | elastin microfibril interfacier 1                                                        | 0.23                                          | -0.85                                         | -1.12                                          | -1.10                                          | -1.11                                           |
| PODN               | podocan                                                                                  | -0.32                                         | -0.04                                         | -0.87                                          | -1.09                                          | -1.54                                           |
| TNXB               | tenascin XB                                                                              | 0.98                                          | 1.42                                          | -1.67                                          | -1.93                                          | -2.63                                           |
| PXDN               | peroxidase homolog ( <i>Drosophila</i> )                                                 | 0.22                                          | -0.29                                         | -0.37                                          | -1.57                                          | -1.80                                           |
| MMP11              | matrix metalloproteinase 11 (stromelysin 3)                                              | 0.47                                          | -0.92                                         | -0.95                                          | -1.06                                          | -1.35                                           |
| PXDN               | peroxidase homolog ( <i>Drosophila</i> )                                                 | 0.29                                          | -0.26                                         | -0.30                                          | -1.71                                          | -1.80                                           |
| MMP7               | matrix metalloproteinase 7 (matrilysin, uterine)                                         | -0.40                                         | -0.71                                         | -0.74                                          | -0.64                                          | -1.27                                           |
| TNXB               | tenascin XB                                                                              | -0.18                                         | -0.59                                         | -0.83                                          | -0.98                                          | -1.12                                           |
| LAMC2              | laminin, gamma 2                                                                         | -0.81                                         | 0.15                                          | -0.87                                          | -0.83                                          | -1.33                                           |
| RELL2              | RELT-like 2                                                                              | -0.36                                         | -0.64                                         | -0.64                                          | -0.52                                          | -1.52                                           |
| FBLN1 <sup>a</sup> | fibulin 1                                                                                | -0.27                                         | -0.51                                         | -0.76                                          | -0.76                                          | -1.32                                           |
| LGALS3BP           | lectin, galactoside-binding, soluble, 3 binding protein                                  | -0.49                                         | -0.49                                         | -1.16                                          | -0.36                                          | -1.10                                           |
| CCDC80             | coiled-coil domain containing 80                                                         | 0.50                                          | 0.37                                          | -0.87                                          | -1.88                                          | -1.64                                           |
| COL7A1             | collagen, type VII, alpha 1                                                              | -1.33                                         | 0.47                                          | -1.54                                          | -0.14                                          | -0.97                                           |
| COL6A1             | collagen, type VI, alpha 1                                                               | -0.59                                         | -0.27                                         | -1.11                                          | -1.01                                          | -0.49                                           |
| NTN1               | netrin 1                                                                                 | -0.54                                         | -0.61                                         | -0.57                                          | -0.59                                          | -1.01                                           |
| FBN1               | fibrillin 1                                                                              | 0.61                                          | 0.97                                          | -0.98                                          | -1.95                                          | -1.86                                           |
| COL27A1            | collagen, type XXVII, alpha 1                                                            | 0.55                                          | -0.49                                         | -1.05                                          | -1.19                                          | -1.03                                           |
| TNR                | tenascin R (restrictin, janusin)                                                         | -0.25                                         | -0.30                                         | -0.66                                          | -1.12                                          | -0.82                                           |
| CD248              | CD248 molecule, endosialin                                                               | 0.99                                          | 0.28                                          | -1.12                                          | -1.42                                          | -1.81                                           |
| PODNL1             | podocan-like 1                                                                           | 0.49                                          | -0.41                                         | -1.26                                          | -0.84                                          | -1.00                                           |
| WNT11              | wingless-type MMTV integration site family, member 11                                    | -0.43                                         | -0.37                                         | -0.53                                          | -0.67                                          | -0.97                                           |
| TGFB1              | transforming growth factor, beta 1                                                       | -0.33                                         | -0.55                                         | -0.37                                          | -0.52                                          | -1.14                                           |
| MMP9               | matrix metalloproteinase 9 (gelatinase B, 92 kDa gelatinase, 92 kDa type IV collagenase) | -0.28                                         | -0.48                                         | -0.54                                          | -0.62                                          | -1.00                                           |
| ELN <sup>a</sup>   | elastin                                                                                  | 0.12                                          | -0.40                                         | -0.74                                          | -0.74                                          | -1.11                                           |
| LAMC1              | laminin, gamma 1 (formerly LAMB2)                                                        | 1.41                                          | 0.67                                          | -0.84                                          | -1.84                                          | -2.07                                           |
| LOX                | lysyl oxidase                                                                            | 0.99                                          | 1.62                                          | -0.88                                          | -2.55                                          | -1.81                                           |
| COL12A1            | collagen, type XII, alpha 1                                                              | 1.55                                          | 0.80                                          | -0.62                                          | -2.47                                          | -1.88                                           |
| COL16A1            | collagen, type XVI, alpha 1                                                              | 0.58                                          | 0.13                                          | -1.10                                          | -0.91                                          | -1.08                                           |
| ADAMTSL4           | ADAMTS-like 4                                                                            | 0.30                                          | 0.13                                          | -0.90                                          | -0.67                                          | -1.14                                           |
| ADAMTS13           | ADAM metalloproteinase with thrombospondin type 1 motif, 13                              | 0.04                                          | -0.08                                         | -0.53                                          | -0.64                                          | -1.04                                           |
| FBLN7              | fibulin 7                                                                                | 0.13                                          | -0.26                                         | -0.32                                          | -0.38                                          | -1.34                                           |
| COL6A6             | collagen, type VI, alpha 6                                                               | 0.91                                          | -0.49                                         | -0.70                                          | -0.78                                          | -1.06                                           |
| LAMA2              | laminin, alpha 2                                                                         | 1.12                                          | -0.52                                         | 0.06                                           | -1.41                                          | -1.27                                           |
| PODNL1             | podocan-like 1                                                                           | 0.28                                          | -0.05                                         | -0.61                                          | -0.48                                          | -1.06                                           |
| FLRT2              | fibronectin leucine rich transmembrane protein 2                                         | -0.57                                         | 0.28                                          | 0.61                                           | -1.09                                          | -0.82                                           |
| ADAMTS5            | ADAM metalloproteinase with thrombospondin type 1 motif, 5                               | 0.98                                          | 1.33                                          | -0.37                                          | -1.70                                          | -1.79                                           |

(continued)

SUPPLEMENTARY TABLE S2. (CONTINUED)

| <i>Gene name</i>   | <i>Description</i>                                                            | <i>cen3tel PD37<br/>versus PD15<br/>logFC</i> | <i>cen3tel PD97<br/>versus PD15<br/>logFC</i> | <i>cen3tel PD167<br/>versus PD15<br/>logFC</i> | <i>cen3tel PD618<br/>versus PD15<br/>logFC</i> | <i>cen3tel PD1034<br/>versus PD15<br/>logFC</i> |
|--------------------|-------------------------------------------------------------------------------|-----------------------------------------------|-----------------------------------------------|------------------------------------------------|------------------------------------------------|-------------------------------------------------|
| DAG1               | dystroglycan 1 (dystrophin-associated glycoprotein 1)                         | 0.36                                          | -0.09                                         | 0.01                                           | -0.33                                          | -1.17                                           |
| ZP3                | zona pellucida glycoprotein 3 (sperm receptor)                                | 0.21                                          | 0.21                                          | 0.11                                           | -0.53                                          | -1.05                                           |
| ADAMTSL5           | ADAMTS-like 5                                                                 | -0.06                                         | 0.48                                          | 0.30                                           | -0.29                                          | -1.37                                           |
| EFEMP1             | EGF-containing fibulin-like extracellular matrix protein 1                    | 2.32                                          | 1.75                                          | 0.49                                           | -2.85                                          | -2.37                                           |
| PAPLN              | papilin, proteoglycan-ike sulfated glycoprotein                               | 0.00                                          | -0.18                                         | 0.01                                           | -0.15                                          | -0.31                                           |
| WNT5A              | wingless-type MMTV integration site family, member 5A                         | 1.10                                          | 1.90                                          | -1.15                                          | -2.05                                          | -0.41                                           |
| COL5A2             | collagen, type V, alpha 2                                                     | 1.52                                          | 0.09                                          | 0.26                                           | -1.48                                          | -0.85                                           |
| LAMC2              | laminin, gamma 2                                                              | -0.19                                         | 1.00                                          | -0.25                                          | -0.19                                          | -0.82                                           |
| MATN2              | matrilin 2                                                                    | -0.37                                         | 1.42                                          | 1.71                                           | -0.98                                          | -1.86                                           |
| SPOCK1             | sparc/osteonectin, cwcv and kazal-like domains proteoglycan (testican) 1      | 0.78                                          | 1.20                                          | -0.63                                          | -1.01                                          | -0.39                                           |
| LAMB1              | laminin, beta 1                                                               | 1.89                                          | 1.14                                          | -1.38                                          | -0.64                                          | -0.99                                           |
| ADAMTS12           | ADAM metalloproteinase with thrombospondin type 1 motif, 12                   | -1.33                                         | -0.60                                         | 0.93                                           | 0.86                                           | 0.22                                            |
| LTBP1              | latent transforming growth factor beta binding protein 1                      | -0.36                                         | 1.22                                          | -0.58                                          | 0.05                                           | -0.16                                           |
| FGF9               | fibroblast growth factor 9 (glia-activating factor)                           | 0.82                                          | 0.24                                          | 0.98                                           | -0.74                                          | -1.04                                           |
| ADAMTSL5           | ADAMTS-like 5                                                                 | 0.23                                          | 0.98                                          | 0.54                                           | -0.15                                          | -1.31                                           |
| ADAMTS1            | ADAM metalloproteinase with thrombospondin type 1 motif, 1                    | -0.73                                         | 1.90                                          | 0.99                                           | -0.90                                          | -0.79                                           |
| SNCA               | synuclein, alpha (non A4 component of amyloid precursor)                      | 1.42                                          | -0.44                                         | -0.46                                          | -0.19                                          | 0.20                                            |
| MMP16              | matrix metalloproteinase 16 (membrane-inserted)                               | -0.21                                         | -0.82                                         | -0.92                                          | 0.97                                           | 1.58                                            |
| ADAMTS1            | ADAM metalloproteinase with thrombospondin type 1 motif, 1                    | -0.71                                         | 1.83                                          | 1.01                                           | -0.89                                          | -0.62                                           |
| LAMA3              | laminin, alpha 3                                                              | 0.27                                          | 1.69                                          | 0.83                                           | -0.73                                          | -1.25                                           |
| ANG                | angiogenin, ribonuclease, RNase A family, 5                                   | 1.34                                          | 0.35                                          | -0.05                                          | -0.43                                          | -0.40                                           |
| COL17A1            | collagen, type XVII, alpha 1                                                  | -0.40                                         | -0.02                                         | -0.23                                          | 1.49                                           | 0.25                                            |
| ADAMTS6            | ADAM metalloproteinase with thrombospondin type 1 motif, 6                    | -0.34                                         | 1.81                                          | -0.03                                          | 0.13                                           | -0.31                                           |
| VEGFA <sup>a</sup> | vascular endothelial growth factor A                                          | -0.20                                         | -0.10                                         | -0.09                                          | -0.05                                          | 1.80                                            |
| VEGFA <sup>a</sup> | vascular endothelial growth factor A                                          | -1.06                                         | 0.91                                          | -0.68                                          | 0.23                                           | 2.05                                            |
| HAPLN1             | hyaluronan and proteoglycan link protein 1                                    | -0.07                                         | -0.17                                         | 0.50                                           | 1.15                                           | 0.11                                            |
| LAMA3              | laminin, alpha 3                                                              | 0.39                                          | 1.08                                          | 0.22                                           | -0.16                                          | 0.02                                            |
| COL12A1            | collagen, type XII, alpha 1                                                   | 1.58                                          | 1.55                                          | 1.01                                           | -1.69                                          | -0.81                                           |
| LAMA1 <sup>a</sup> | laminin, alpha 1                                                              | 0.10                                          | 0.03                                          | 0.06                                           | 0.02                                           | 1.64                                            |
| VEGFA <sup>a</sup> | vascular endothelial growth factor A                                          | -0.64                                         | 0.96                                          | -0.37                                          | 0.08                                           | 1.90                                            |
| COL17A1            | collagen, type XVII, alpha 1                                                  | -0.38                                         | 0.18                                          | -0.36                                          | 1.67                                           | 0.96                                            |
| COL4A1             | collagen, type IV, alpha 1                                                    | -0.44                                         | 1.69                                          | 0.82                                           | 0.14                                           | 0.00                                            |
| CRTAP              | cartilage associated protein                                                  | 0.14                                          | -0.29                                         | 0.68                                           | 1.02                                           | 0.94                                            |
| FGF1 <sup>a</sup>  | fibroblast growth factor 1 (acidic)                                           | -0.22                                         | 1.16                                          | 0.90                                           | 0.57                                           | 0.13                                            |
| COL8A1             | collagen, type VIII, alpha 1                                                  | 0.93                                          | 0.03                                          | 1.26                                           | 0.29                                           | 0.15                                            |
| SLC1A3             | solute carrier family 1 (glial high-affinity glutamate transporter), member 3 | 0.72                                          | 0.10                                          | -0.45                                          | 0.70                                           | 1.77                                            |
| FBN2               | fibrillin 2                                                                   | 3.62                                          | 0.28                                          | -0.19                                          | -0.18                                          | -0.67                                           |
| FLRT3              | fibronectin leucine rich transmembrane protein 3                              | 0.37                                          | 1.55                                          | 1.92                                           | -0.64                                          | -0.33                                           |
| FLRT2              | fibronectin leucine rich transmembrane protein 2                              | 0.46                                          | 1.32                                          | 1.50                                           | 0.00                                           | -0.38                                           |

(continued)

SUPPLEMENTARY TABLE S2. (CONTINUED)

| <i>Gene name</i>      | <i>Description</i>                                                                   | <i>cen3tel PD37<br/>versus PD15<br/>logFC</i> | <i>cen3tel PD97<br/>versus PD15<br/>logFC</i> | <i>cen3tel PD167<br/>versus PD15<br/>logFC</i> | <i>cen3tel PD618<br/>versus PD15<br/>logFC</i> | <i>cen3tel PD1034<br/>versus PD15<br/>logFC</i> |
|-----------------------|--------------------------------------------------------------------------------------|-----------------------------------------------|-----------------------------------------------|------------------------------------------------|------------------------------------------------|-------------------------------------------------|
| ADAMTSL1 <sup>a</sup> | ADAMTS-like 1                                                                        | -0.01                                         | 0.32                                          | 1.65                                           | 0.58                                           | 0.36                                            |
| ERBB2IP               | erbb2 interacting protein                                                            | 0.31                                          | 1.36                                          | 0.82                                           | 0.14                                           | 0.27                                            |
| MAMDC2                | MAM domain containing 2                                                              | 0.90                                          | 2.15                                          | 0.78                                           | 0.22                                           | -1.13                                           |
| FGF1 <sup>a</sup>     | fibroblast growth factor 1 (acidic)                                                  | -0.43                                         | 1.34                                          | 1.19                                           | 0.79                                           | 0.13                                            |
| SMC3                  | structural maintenance of<br>chromosomes 3                                           | 0.09                                          | 0.66                                          | 0.59                                           | 0.74                                           | 1.13                                            |
| COL3A1 <sup>a</sup>   | collagen, type III, alpha 1                                                          | 2.03                                          | 0.23                                          | -0.31                                          | -0.37                                          | 1.67                                            |
| FGF1 <sup>a</sup>     | fibroblast growth factor 1 (acidic)                                                  | 0.04                                          | 1.91                                          | 0.62                                           | 0.41                                           | 0.46                                            |
| ADAMTSL1 <sup>a</sup> | ADAMTS-like 1                                                                        | -0.07                                         | 0.51                                          | 1.71                                           | 0.69                                           | 0.60                                            |
| GPC6                  | glypican 6                                                                           | 0.49                                          | 0.62                                          | 0.29                                           | 0.66                                           | 1.74                                            |
| VEGFA <sup>a</sup>    | vascular endothelial growth factor A                                                 | -0.81                                         | 1.64                                          | 0.38                                           | 1.64                                           | 0.96                                            |
| DST                   | dystonin                                                                             | 0.57                                          | 1.86                                          | 0.85                                           | 0.02                                           | 0.73                                            |
| SLC1A3                | solute carrier family 1 (glial high-<br>affinity glutamate transporter),<br>member 3 | 1.54                                          | -0.08                                         | -1.94                                          | 1.83                                           | 2.69                                            |
| LAMA1 <sup>a</sup>    | laminin, alpha 1                                                                     | 0.74                                          | 0.47                                          | 0.55                                           | 0.83                                           | 1.57                                            |
| COL4A2                | collagen, type IV, alpha 2                                                           | -0.27                                         | 2.02                                          | 1.05                                           | 0.66                                           | 0.85                                            |
| THSD4                 | thrombospondin, type I, domain<br>containing 4                                       | 0.36                                          | 1.31                                          | 1.01                                           | 0.90                                           | 1.41                                            |
| LAMA1 <sup>a</sup>    | laminin, alpha 1                                                                     | 0.54                                          | 0.24                                          | 0.67                                           | 1.80                                           | 1.91                                            |
| MFAP5                 | microfibrillar associated protein 5                                                  | 0.40                                          | 3.41                                          | 1.80                                           | 0.30                                           | -0.54                                           |
| RELN                  | reelin                                                                               | 2.35                                          | 2.10                                          | -0.03                                          | 0.98                                           | 0.14                                            |
| COL8A1                | collagen, type VIII, alpha 1                                                         | 1.72                                          | 0.02                                          | 2.29                                           | 0.85                                           | 0.66                                            |
| NID2                  | nidogen 2 (osteonidogen)                                                             | 0.38                                          | 3.15                                          | 2.46                                           | -0.25                                          | 0.00                                            |
| LAMB3                 | laminin, beta 3                                                                      | -0.38                                         | 0.64                                          | -0.82                                          | 3.00                                           | 3.77                                            |
| BMP4                  | bone morphogenetic protein 4                                                         | 0.56                                          | 2.24                                          | 2.73                                           | 0.61                                           | 0.71                                            |
| ADAMTSL1 <sup>a</sup> | ADAMTS-like 1                                                                        | 0.23                                          | 1.96                                          | 2.65                                           | 1.98                                           | 2.29                                            |
| COL4A5                | collagen, type IV, alpha 5                                                           | 0.99                                          | 2.58                                          | 2.99                                           | 1.77                                           | 2.05                                            |
| COL11A1               | collagen, type XI, alpha 1                                                           | 1.97                                          | 2.58                                          | 2.87                                           | 3.12                                           | 2.09                                            |
| NTN4                  | netrin 4                                                                             | 2.81                                          | 4.66                                          | 4.09                                           | 1.67                                           | 1.33                                            |

<sup>a</sup>Genes with more than one probe on the array.



SUPPLEMENTARY TABLE S3. ECM REMODELING GENES

| <i>Gene name</i>     | <i>Description</i>                                                                      | <i>cen3tel PD37<br/>versus PD15<br/>logFC</i> | <i>cen3tel PD97<br/>versus PD15<br/>logFC</i> | <i>cen3tel PD167<br/>versus PD15<br/>logFC</i> | <i>cen3tel PD618<br/>versus PD15<br/>logFC</i> | <i>cen3tel PD1034<br/>versus PD15<br/>logFC</i> |
|----------------------|-----------------------------------------------------------------------------------------|-----------------------------------------------|-----------------------------------------------|------------------------------------------------|------------------------------------------------|-------------------------------------------------|
| ADAM33 <sup>a</sup>  | ADAM metallopeptidase domain 33                                                         | 0.68                                          | 0.05                                          | -0.30                                          | -1.06                                          | -1.66                                           |
| ADAM33 <sup>a</sup>  | ADAM metallopeptidase domain 33                                                         | 0.85                                          | 0.19                                          | -0.05                                          | -0.73                                          | -1.63                                           |
| ADAMTS12             | ADAM metallopeptidase with thrombospondin type 1 motif, 12                              | -1.33                                         | -0.60                                         | 0.93                                           | 0.86                                           | 0.22                                            |
| ADAMTS13             | ADAM metallopeptidase with thrombospondin type 1 motif, 13                              | 0.04                                          | -0.08                                         | -0.53                                          | -0.64                                          | -1.04                                           |
| ADAMTS14             | ADAM metallopeptidase with thrombospondin type 1 motif, 14                              | 0.29                                          | -0.59                                         | -1.23                                          | -1.78                                          | -1.94                                           |
| ADAMTS2 <sup>a</sup> | ADAM metallopeptidase with thrombospondin type 1 motif, 2                               | -0.04                                         | -0.50                                         | -0.95                                          | -1.45                                          | -1.82                                           |
| ADAMTS2 <sup>a</sup> | ADAM metallopeptidase with thrombospondin type 1 motif, 2                               | -0.25                                         | -0.73                                         | -0.78                                          | -0.96                                          | -1.66                                           |
| ADAMTS4              | ADAM metallopeptidase with thrombospondin type 1 motif, 4                               | -0.60                                         | -1.07                                         | -1.69                                          | -1.21                                          | -1.81                                           |
| ADAMTS5              | ADAM metallopeptidase with thrombospondin type 1 motif, 5                               | 0.98                                          | 1.33                                          | -0.37                                          | -1.70                                          | -1.79                                           |
| AGT                  | angiotensinogen (serpin peptidase inhibitor, clade A, member 8)                         | -0.17                                         | -0.68                                         | -1.09                                          | -0.96                                          | -1.62                                           |
| CPZ                  | carboxypeptidase Z                                                                      | 0.59                                          | -0.07                                         | -1.32                                          | -1.88                                          | -2.68                                           |
| DPP4                 | dipeptidyl-peptidase 4                                                                  | 0.10                                          | -4.18                                         | -4.78                                          | -4.90                                          | -5.65                                           |
| FAP                  | fibroblast activation protein, alpha                                                    | 0.43                                          | -1.83                                         | -2.67                                          | -2.30                                          | -1.42                                           |
| LTBP4                | latent transforming growth factor beta binding protein 4                                | -0.63                                         | -0.57                                         | -1.25                                          | -1.50                                          | -1.63                                           |
| MMP1                 | matrix metallopeptidase 1 (interstitial collagenase)                                    | -1.18                                         | -3.76                                         | -4.37                                          | -4.08                                          | -4.37                                           |
| MMP10                | matrix metallopeptidase 10 (stromelysin 2)                                              | -2.19                                         | -1.77                                         | -2.95                                          | -2.77                                          | -3.46                                           |
| MMP11                | matrix metallopeptidase 11 (stromelysin 3)                                              | 0.47                                          | -0.92                                         | -0.95                                          | -1.06                                          | -1.35                                           |
| MMP12 <sup>a</sup>   | matrix metallopeptidase 12 (macrophage elastase)                                        | -4.11                                         | -4.05                                         | -5.77                                          | -5.75                                          | -5.99                                           |
| MMP12 <sup>a</sup>   | matrix metallopeptidase 12 (macrophage elastase)                                        | -4.03                                         | -3.90                                         | -5.33                                          | -5.35                                          | -5.89                                           |
| MMP14                | matrix metallopeptidase 14 (membrane-inserted)                                          | 0.46                                          | -0.74                                         | -2.35                                          | -2.73                                          | -1.54                                           |
| MMP19 <sup>a</sup>   | matrix metallopeptidase 19                                                              | -0.55                                         | 0.27                                          | -2.42                                          | -2.22                                          | -2.44                                           |
| MMP19 <sup>a</sup>   | matrix metallopeptidase 19                                                              | -0.32                                         | -0.08                                         | -0.98                                          | -1.10                                          | -1.59                                           |
| MMP2                 | matrix metallopeptidase 2 (gelatinase A, 72 kDa gelatinase, 72 kDa type IV collagenase) | 0.27                                          | -2.20                                         | -2.96                                          | -2.15                                          | -3.81                                           |
| MMP27                | matrix metallopeptidase 27                                                              | -0.20                                         | -1.89                                         | -2.01                                          | -1.99                                          | -2.53                                           |
| MMP3                 | matrix metallopeptidase 3 (stromelysin 1, progelatinase)                                | -1.24                                         | -2.85                                         | -3.51                                          | -2.94                                          | -2.85                                           |
| MMP7                 | matrix metallopeptidase 7 (matrilysin, uterine)                                         | -0.40                                         | -0.71                                         | -0.74                                          | -0.64                                          | -1.27                                           |
| PLAT                 | plasminogen activator, tissue                                                           | -2.78                                         | -0.33                                         | -3.67                                          | -3.98                                          | -3.77                                           |
| PLAU                 | plasminogen activator, urokinase                                                        | -0.18                                         | 1.00                                          | -1.28                                          | -0.63                                          | -0.19                                           |
| PLAUR                | plasminogen activator, urokinase receptor                                               | -1.37                                         | -0.35                                         | -0.88                                          | -0.86                                          | -1.08                                           |

(continued)

SUPPLEMENTARY TABLE S3. (CONTINUED)

| <i>Gene name</i>      | <i>Description</i>                                                                            | <i>cen3tel PD37<br/>versus PD15<br/>logFC</i> | <i>cen3tel PD97<br/>versus PD15<br/>logFC</i> | <i>cen3tel PD167<br/>versus PD15<br/>logFC</i> | <i>cen3tel PD618<br/>versus PD15<br/>logFC</i> | <i>cen3tel PD1034<br/>versus PD15<br/>logFC</i> |
|-----------------------|-----------------------------------------------------------------------------------------------|-----------------------------------------------|-----------------------------------------------|------------------------------------------------|------------------------------------------------|-------------------------------------------------|
| SERPINA3              | serpin peptidase inhibitor, clade A (alpha-1 antiproteinase, antitrypsin), member 3           | -0.28                                         | -0.28                                         | -0.49                                          | -0.45                                          | -1.04                                           |
| SERPINE1 <sup>a</sup> | serpin peptidase inhibitor, clade E (nexin, plasminogen activator inhibitor type 1), member 1 | -2.21                                         | 0.15                                          | -2.12                                          | -1.82                                          | -2.86                                           |
| SERPINE1 <sup>a</sup> | serpin peptidase inhibitor, clade E (nexin, plasminogen activator inhibitor type 1), member 1 | -1.57                                         | -0.09                                         | -1.25                                          | -0.79                                          | -1.41                                           |
| THBS1 <sup>a</sup>    | thrombospondin 1                                                                              | 1.21                                          | -0.09                                         | -3.01                                          | -3.26                                          | -3.08                                           |
| THBS1 <sup>a</sup>    | thrombospondin 1                                                                              | 0.79                                          | 0.14                                          | -2.31                                          | -2.74                                          | -2.85                                           |
| TIMP1                 | TIMP metalloproteinase inhibitor 1                                                            | -0.05                                         | -0.61                                         | -2.05                                          | -2.03                                          | -2.26                                           |
| TIMP3                 | TIMP metalloproteinase inhibitor 3                                                            | -1.02                                         | 0.96                                          | -2.87                                          | -4.36                                          | -5.08                                           |
| MMP16                 | matrix metalloproteinase 16 (membrane-inserted)                                               | -0.21                                         | -0.82                                         | -0.92                                          | 0.97                                           | 1.58                                            |
| ADAM15                | ADAM metalloproteinase domain 15                                                              | 0.60                                          | 0.85                                          | 0.02                                           | -0.50                                          | 1.72                                            |
| ADAM9                 | ADAM metalloproteinase domain 9 (meltrin gamma)                                               | 0.14                                          | 0.34                                          | 0.60                                           | 0.64                                           | 1.53                                            |

<sup>a</sup>Genes with more than one probe on the array.

SUPPLEMENTARY TABLE S4. LIST OF GENES ASSOCIATED TO POSITIVE REGULATION OF CELL DIFFERENTIATION

| <i>Gene name</i>    | <i>Description</i>                                                                                              | <i>cen3tel PD37<br/>versus PD15<br/>logFC</i> | <i>cen3tel PD97<br/>versus PD15<br/>logFC</i> | <i>cen3tel PD167<br/>versus PD15<br/>logFC</i> | <i>cen3tel PD618<br/>versus PD15<br/>logFC</i> | <i>cen3tel PD1034<br/>versus PD15<br/>logFC</i> |
|---------------------|-----------------------------------------------------------------------------------------------------------------|-----------------------------------------------|-----------------------------------------------|------------------------------------------------|------------------------------------------------|-------------------------------------------------|
| GATA6               | GATA binding protein 6                                                                                          | 0.12                                          | 2.84                                          | 0.14                                           | -0.01                                          | 0.03                                            |
| NEFL <sup>a</sup>   | neurofilament, light polypeptide                                                                                | 0.43                                          | 5.15                                          | 0.38                                           | 0.98                                           | 0.31                                            |
| ROBO2               | roundabout, axon guidance<br>receptor, homolog 2<br>( <i>Drosophila</i> )                                       | 1.89                                          | 2.21                                          | 0.15                                           | -1.68                                          | -1.80                                           |
| JAG1                | jagged 1 (Alagille syndrome)                                                                                    | 1.06                                          | 2.10                                          | 0.40                                           | -0.65                                          | -0.90                                           |
| NEFL <sup>a</sup>   | neurofilament, light polypeptide                                                                                | -0.06                                         | 2.85                                          | 0.05                                           | 0.23                                           | -0.23                                           |
| TGFBR2              | transforming growth factor, beta<br>receptor II (70/80 kDa)                                                     | -0.93                                         | -0.08                                         | -2.39                                          | -0.57                                          | -0.69                                           |
| BDNF <sup>a</sup>   | brain-derived neurotrophic factor                                                                               | -0.07                                         | 1.48                                          | 2.82                                           | 0.29                                           | -0.29                                           |
| BDNF <sup>a</sup>   | brain-derived neurotrophic factor                                                                               | 0.65                                          | 2.31                                          | 3.28                                           | 1.04                                           | 0.96                                            |
| TGFB2               | transforming growth factor,<br>beta 2                                                                           | -1.24                                         | 1.78                                          | 2.11                                           | -0.75                                          | -0.02                                           |
| DNMT3B              | DNA (cytosine-5-)<br>-methyltransferase 3 beta                                                                  | -0.19                                         | 0.22                                          | 2.53                                           | 1.72                                           | 1.61                                            |
| BMP4                | bone morphogenetic protein 4                                                                                    | 0.56                                          | 2.24                                          | 2.73                                           | 0.61                                           | 0.71                                            |
| AGTR1               | angiotensin II receptor, type 1                                                                                 | 1.52                                          | -0.73                                         | 2.33                                           | 1.82                                           | 1.11                                            |
| IL7                 | interleukin 7                                                                                                   | -0.58                                         | -1.96                                         | -3.05                                          | -1.14                                          | -1.35                                           |
| SOCS5               | suppressor of cytokine<br>signaling 5                                                                           | 0.35                                          | -0.57                                         | -1.33                                          | -2.01                                          | -1.33                                           |
| FOXP1 <sup>a</sup>  | forkhead box G1                                                                                                 | -0.15                                         | -0.15                                         | 2.38                                           | 2.16                                           | 1.10                                            |
| FGF2                | fibroblast growth factor 2 (basic)                                                                              | -0.78                                         | 0.39                                          | -2.78                                          | -2.41                                          | -2.00                                           |
| PPARG               | peroxisome proliferator-activated<br>receptor gamma                                                             | 0.84                                          | 0.59                                          | 1.60                                           | 2.76                                           | 2.43                                            |
| IL6R                | interleukin 6 receptor                                                                                          | 0.49                                          | -0.22                                         | -1.01                                          | -1.11                                          | -2.29                                           |
| NRCAM               | neuronal cell adhesion molecule                                                                                 | -0.12                                         | -0.95                                         | -1.27                                          | -1.20                                          | -2.10                                           |
| BOC                 | Boc homolog (mouse)                                                                                             | -0.54                                         | -1.08                                         | -3.08                                          | -2.98                                          | -3.43                                           |
| CLU                 | clusterin                                                                                                       | -0.24                                         | 0.66                                          | -2.62                                          | -2.76                                          | -3.03                                           |
| CDKN2B              | cyclin-dependent kinase inhibitor<br>2B (p15, inhibits CDK4)                                                    | -0.16                                         | 0.66                                          | -2.40                                          | -2.38                                          | -2.75                                           |
| FOXP1 <sup>a</sup>  | forkhead box G1                                                                                                 | -0.49                                         | -0.42                                         | 4.10                                           | 3.54                                           | 2.72                                            |
| MAP1B               | microtubule-associated<br>protein 1B                                                                            | 0.66                                          | 1.96                                          | 1.97                                           | 1.90                                           | 2.01                                            |
| ID2 <sup>a</sup>    | inhibitor of DNA binding 2,<br>dominant negative helix-loop-<br>helix protein                                   | 0.13                                          | -0.73                                         | -1.31                                          | -3.18                                          | -4.29                                           |
| NGF                 | nerve growth factor (beta<br>polypeptide)                                                                       | -0.84                                         | 0.73                                          | 0.06                                           | -0.82                                          | -2.25                                           |
| IGFBP3 <sup>a</sup> | insulin-like growth factor<br>binding protein 3                                                                 | -1.20                                         | -0.94                                         | -2.56                                          | -4.01                                          | -3.93                                           |
| ARHGDI A            | Rho GDP dissociation inhibitor<br>(GDI) alpha                                                                   | -0.53                                         | -0.51                                         | -0.32                                          | -0.14                                          | -2.06                                           |
| KITLG               | KIT ligand                                                                                                      | -1.18                                         | 0.32                                          | -0.87                                          | -1.53                                          | -2.19                                           |
| PLXNB2 <sup>a</sup> | plexin B2                                                                                                       | -0.43                                         | -0.42                                         | -1.47                                          | -1.78                                          | -2.39                                           |
| JUNB                | jun B proto-oncogene                                                                                            | -0.47                                         | -0.41                                         | -0.85                                          | -1.38                                          | -2.29                                           |
| KIT                 | v-kit Hardy-Zuckerman 4 feline<br>sarcoma viral oncogene<br>homolog                                             | 1.37                                          | 1.01                                          | 2.25                                           | -1.14                                          | -2.71                                           |
| CD83                | CD83 molecule                                                                                                   | -0.64                                         | 1.72                                          | 0.02                                           | -1.61                                          | -2.44                                           |
| SH3PXD2B            | SH3 and PX domains 2B                                                                                           | -0.29                                         | -0.28                                         | -0.75                                          | -1.15                                          | -2.02                                           |
| SERPINF1            | serpin peptidase inhibitor, clade<br>F (alpha-2 antiplasmin,<br>pigment epithelium derived<br>factor), member 1 | -0.97                                         | -3.78                                         | -3.98                                          | -3.96                                          | -4.60                                           |
| LYN                 | v-yes-1 Yamaguchi sarcoma viral<br>related oncogene homolog                                                     | -0.11                                         | -1.24                                         | -2.22                                          | -2.19                                          | -2.65                                           |
| SOCS3               | suppressor of cytokine<br>signaling 3                                                                           | -0.78                                         | -0.55                                         | -1.42                                          | -1.44                                          | -2.74                                           |
| RUNX1               | runt-related transcription factor 1                                                                             | -0.35                                         | 0.20                                          | -1.29                                          | -1.22                                          | -2.28                                           |
| NTN1                | netrin 1                                                                                                        | 0.09                                          | -2.34                                         | -2.75                                          | -2.86                                          | -3.10                                           |

(continued)

SUPPLEMENTARY TABLE S4. (CONTINUED)

| <i>Gene name</i>    | <i>Description</i>                                                            | <i>cen3tel PD37<br/>versus PD15<br/>logFC</i> | <i>cen3tel PD97<br/>versus PD15<br/>logFC</i> | <i>cen3tel PD167<br/>versus PD15<br/>logFC</i> | <i>cen3tel PD618<br/>versus PD15<br/>logFC</i> | <i>cen3tel PD1034<br/>versus PD15<br/>logFC</i> |
|---------------------|-------------------------------------------------------------------------------|-----------------------------------------------|-----------------------------------------------|------------------------------------------------|------------------------------------------------|-------------------------------------------------|
| LIMK1               | LIM domain kinase 1                                                           | -1.13                                         | -1.07                                         | -2.24                                          | -1.32                                          | -2.46                                           |
| FOXO3 <sup>a</sup>  | forkhead box O3                                                               | -1.31                                         | -0.44                                         | -2.15                                          | -2.16                                          | -3.09                                           |
| IGF2                | insulin-like growth factor 2<br>(somatomedin A)                               | -2.16                                         | -3.41                                         | -3.67                                          | -3.72                                          | -4.21                                           |
| IL6                 | interleukin 6 (interferon, beta 2)                                            | 0.13                                          | 3.73                                          | 0.02                                           | -0.83                                          | -2.59                                           |
| PLXNB2 <sup>a</sup> | plexin B2                                                                     | -0.43                                         | -0.47                                         | -1.50                                          | -1.78                                          | -2.47                                           |
| SCIN                | scinderin                                                                     | 1.93                                          | -1.99                                         | -2.57                                          | -2.38                                          | -3.09                                           |
| STAT5A              | signal transducer and activator of<br>transcription 5 <sup>o</sup>            | 0.26                                          | -0.08                                         | -1.86                                          | -1.39                                          | -2.26                                           |
| IGFBP3 <sup>a</sup> | insulin-like growth factor<br>binding protein 3                               | -0.86                                         | -0.84                                         | -3.68                                          | -4.87                                          | -4.36                                           |
| IL4R                | interleukin 4 receptor                                                        | -0.61                                         | -0.36                                         | -1.05                                          | -1.60                                          | -2.36                                           |
| FOXO3 <sup>a</sup>  | forkhead box O3                                                               | -1.35                                         | -0.43                                         | -2.05                                          | -2.01                                          | -3.08                                           |
| BMP6                | bone morphogenetic protein 6                                                  | -1.73                                         | -0.65                                         | -1.65                                          | -1.77                                          | -2.19                                           |
| BMP2                | bone morphogenetic protein 2                                                  | -1.33                                         | -2.77                                         | -3.01                                          | -2.70                                          | -3.41                                           |
| VEGFC               | vascular endothelial growth<br>factor C                                       | -2.66                                         | -0.07                                         | -1.99                                          | -2.10                                          | -2.52                                           |
| SMAD1               | SMAD family member 1                                                          | 1.27                                          | 1.58                                          | 0.85                                           | 0.79                                           | 2.38                                            |
| ADA                 | adenosine deaminase                                                           | -1.84                                         | -2.08                                         | -2.35                                          | -2.44                                          | -2.31                                           |
| CCL5                | chemokine (C-C motif) ligand 5                                                | -3.11                                         | -1.03                                         | -3.84                                          | -3.49                                          | -4.79                                           |
| ID2 <sup>a</sup>    | inhibitor of DNA binding 2,<br>dominant negative helix-loop-<br>helix protein | -0.36                                         | -1.24                                         | -1.64                                          | -3.32                                          | -4.35                                           |

<sup>a</sup>Genes with more than one probe on the array.

SUPPLEMENTARY TABLE S5. LIST OF THE TWO GENES AND FOUR miRS VALIDATED BY REAL-TIME RT-PCR

| <i>Gene</i> | <i>Cen3tel<br/>37</i> | <i>Cen3tel<br/>97</i> | <i>Cen3tel<br/>167</i> | <i>Cen3tel<br/>618</i> | <i>Cen3tel<br/>1034</i> |
|-------------|-----------------------|-----------------------|------------------------|------------------------|-------------------------|
| BMP2        | -2.85                 | -7.55                 | -11.89                 | -7.58                  | -7.39                   |
| BMP6        | -6.30                 | -2.40                 | -5.09                  | -5.87                  | -4.14                   |
| miR-34a     | n.d.                  | -0.50                 | -7.38                  | -6.04                  | -4.87                   |
| miR-145     | n.d.                  | 0.52                  | -0.79                  | -1.63                  | -1.32                   |
| let-7b      | n.d.                  | -0.02                 | -0.83                  | -1.42                  | -1.66                   |
| miR-20a     | n.d.                  | 0.33                  | 1.49                   | 3.10                   | 3.12                    |

The values are the log<sub>2</sub> of the ratio at different PDs, relative to parental cen3 fibroblasts.  
n.d., not determined.

SUPPLEMENTARY TABLE S6. CELL CYCLE GENES

| <i>Gene name</i>    | <i>Description</i>                                                                                        | <i>cen3tel PD37<br/>versus PD15<br/>logFC</i> | <i>cen3tel PD97<br/>versus PD15<br/>logFC</i> | <i>cen3tel PD167<br/>versus PD15<br/>logFC</i> | <i>cen3tel PD618<br/>versus PD15<br/>logFC</i> | <i>cen3tel PD1034<br/>versus PD15<br/>logFC</i> |
|---------------------|-----------------------------------------------------------------------------------------------------------|-----------------------------------------------|-----------------------------------------------|------------------------------------------------|------------------------------------------------|-------------------------------------------------|
| IL12A <sup>a</sup>  | interleukin 12A (natural killer cell stimulatory factor 1, cytotoxic lymphocyte maturation factor 1, p35) | -2.32                                         | -1.44                                         | -2.00                                          | -1.70                                          | -1.85                                           |
| HBEGF               | heparin-binding EGF-like growth factor                                                                    | -2.08                                         | 0.39                                          | 0.36                                           | -0.08                                          | -0.97                                           |
| SPHK1               | sphingosine kinase 1                                                                                      | -2.21                                         | -0.46                                         | -1.47                                          | -0.76                                          | -1.22                                           |
| SSTR1               | somatostatin receptor 1                                                                                   | -0.96                                         | 2.54                                          | 1.02                                           | 0.64                                           | 0.63                                            |
| KLF5                | Kruppel-like factor 5 (intestinal)                                                                        | 1.43                                          | 3.54                                          | 0.34                                           | 0.91                                           | 0.02                                            |
| CXCL10              | chemokine (C-X-C motif) ligand 10                                                                         | -0.65                                         | 2.37                                          | -0.04                                          | 1.93                                           | -0.41                                           |
| SKA1                | spindle and kinetochore associated complex subunit 1                                                      | -0.28                                         | 0.93                                          | 2.05                                           | 1.67                                           | 1.95                                            |
| BDNF <sup>a</sup>   | brain-derived neurotrophic factor                                                                         | -0.07                                         | 1.48                                          | 2.82                                           | 0.29                                           | -0.29                                           |
| BDNF <sup>a</sup>   | brain-derived neurotrophic factor                                                                         | 0.65                                          | 2.31                                          | 3.28                                           | 1.04                                           | 0.96                                            |
| NFIB <sup>a</sup>   | nuclear factor I/B                                                                                        | 0.36                                          | 1.70                                          | 2.25                                           | 1.34                                           | 1.95                                            |
| TM4SF4              | transmembrane 4 L six family member 4                                                                     | -0.14                                         | 0.53                                          | 2.30                                           | -0.08                                          | -0.26                                           |
| SESN1 <sup>a</sup>  | sestrin 1                                                                                                 | 0.00                                          | -0.03                                         | -2.02                                          | -1.78                                          | -1.86                                           |
| PBX1 <sup>a</sup>   | pre-B-cell leukemia homeobox 1                                                                            | 0.82                                          | -1.33                                         | -2.64                                          | -1.17                                          | -0.33                                           |
| TGFBR2              | transforming growth factor, beta receptor II (70/80 kDa)                                                  | -0.93                                         | -0.08                                         | -2.39                                          | -0.57                                          | -0.69                                           |
| RAC2                | ras-related C3 botulinum toxin substrate 2 (rho family, small GTP binding protein Rac2)                   | -0.56                                         | -0.69                                         | -2.67                                          | -1.31                                          | 0.23                                            |
| BMP4                | bone morphogenetic protein 4                                                                              | 0.56                                          | 2.24                                          | 2.73                                           | 0.61                                           | 0.71                                            |
| ATF3 <sup>a</sup>   | activating transcription factor 3                                                                         | -0.70                                         | 3.17                                          | 2.32                                           | 0.37                                           | -0.68                                           |
| ITGA2 <sup>a</sup>  | integrin, alpha 2 (CD49B, alpha 2 subunit of VLA-2 receptor)                                              | -2.99                                         | -2.76                                         | -3.14                                          | 0.00                                           | -0.49                                           |
| RTKN2               | rhotekin 2                                                                                                | 0.12                                          | 1.22                                          | 2.00                                           | 1.33                                           | 1.23                                            |
| ATF3 <sup>a</sup>   | activating transcription factor 3                                                                         | -1.16                                         | 3.65                                          | 2.62                                           | 0.63                                           | -1.12                                           |
| PBX1 <sup>a</sup>   | pre-B-cell leukemia homeobox 1                                                                            | 0.97                                          | -1.46                                         | -3.38                                          | -1.59                                          | -0.65                                           |
| IL7                 | interleukin 7                                                                                             | -0.58                                         | -1.96                                         | -3.05                                          | -1.14                                          | -1.35                                           |
| ITGA2 <sup>a</sup>  | integrin, alpha 2 (CD49B, alpha 2 subunit of VLA-2 receptor)                                              | -2.97                                         | -2.77                                         | -3.01                                          | -0.16                                          | -0.28                                           |
| TGFB2               | transforming growth factor, beta 2                                                                        | -1.24                                         | 1.78                                          | 2.11                                           | -0.75                                          | -0.02                                           |
| MKI67               | antigen identified by monoclonal antibody Ki-67                                                           | 0.86                                          | 1.62                                          | 2.26                                           | 2.63                                           | 1.92                                            |
| UBE2C               | ubiquitin-conjugating enzyme E2C                                                                          | -0.41                                         | 0.67                                          | 1.83                                           | 2.07                                           | 1.85                                            |
| ZMIZ1               | zinc finger, MIZ-type containing 1                                                                        | -1.07                                         | -1.65                                         | -2.37                                          | -2.37                                          | -1.40                                           |
| CCL3L3              | chemokine (C-C motif) ligand 3-like 3                                                                     | -0.24                                         | 0.49                                          | -0.21                                          | 2.18                                           | -0.09                                           |
| FGF2                | fibroblast growth factor 2 (basic)                                                                        | -0.78                                         | 0.39                                          | -2.78                                          | -2.41                                          | -2.00                                           |
| CCND1 <sup>a</sup>  | cyclin D1                                                                                                 | -1.36                                         | -0.65                                         | -2.06                                          | -2.59                                          | -1.86                                           |
| MDM2                | Mdm2 p53 binding protein homolog (mouse)                                                                  | -0.90                                         | -0.03                                         | -2.30                                          | -2.26                                          | -1.69                                           |
| FOXG1 <sup>a</sup>  | forkhead box G1                                                                                           | -0.15                                         | -0.15                                         | 2.38                                           | 2.16                                           | 1.10                                            |
| ASNS                | asparagine synthetase                                                                                     | 1.91                                          | 3.01                                          | 1.70                                           | 2.05                                           | 1.85                                            |
| CDCA3 <sup>a</sup>  | cell division cycle associated 3                                                                          | 0.64                                          | 0.64                                          | 1.89                                           | 2.02                                           | 2.50                                            |
| CCNB1               | cyclin B1                                                                                                 | 0.75                                          | 0.44                                          | 1.90                                           | 1.97                                           | 2.93                                            |
| NCAPH               | non-SMC condensin I complex, subunit H                                                                    | -0.41                                         | 0.58                                          | 1.55                                           | 2.03                                           | 2.38                                            |
| CDCA2 <sup>a</sup>  | cell division cycle associated 2                                                                          | -0.34                                         | 1.09                                          | 1.51                                           | 1.96                                           | 2.91                                            |
| FBXO5               | F-box protein 5                                                                                           | -0.41                                         | 1.83                                          | 1.19                                           | 1.70                                           | 2.56                                            |
| BUB1B               | budding uninhibited by benzimidazoles 1 homolog beta (yeast)                                              | 0.50                                          | 1.25                                          | 1.51                                           | 2.20                                           | 3.09                                            |
| LRRCC1 <sup>a</sup> | leucine rich repeat and coiled-coil domain containing 1                                                   | 0.91                                          | 2.04                                          | 2.06                                           | 2.18                                           | 2.44                                            |
| NUP37               | nucleoporin 37kDa                                                                                         | 0.28                                          | 0.87                                          | 0.92                                           | 1.49                                           | 2.28                                            |
| AURKB               | aurora kinase B                                                                                           | -0.45                                         | 0.58                                          | 1.59                                           | 2.06                                           | 2.24                                            |

(continued)

SUPPLEMENTARY TABLE S6. (CONTINUED)

| <i>Gene name</i>    | <i>Description</i>                                                                 | <i>cen3tel PD37<br/>versus PD15<br/>logFC</i> | <i>cen3tel PD97<br/>versus PD15<br/>logFC</i> | <i>cen3tel PD167<br/>versus PD15<br/>logFC</i> | <i>cen3tel PD618<br/>versus PD15<br/>logFC</i> | <i>cen3tel PD1034<br/>versus PD15<br/>logFC</i> |
|---------------------|------------------------------------------------------------------------------------|-----------------------------------------------|-----------------------------------------------|------------------------------------------------|------------------------------------------------|-------------------------------------------------|
| CHFR                | checkpoint with forkhead and ring<br>finger domains                                | -0.69                                         | -1.61                                         | -1.71                                          | -1.45                                          | -2.39                                           |
| STMN1               | stathmin 1                                                                         | 1.17                                          | 1.89                                          | 2.37                                           | 1.72                                           | 2.16                                            |
| C13orf34            | chromosome 13 open reading<br>frame 34                                             | 0.38                                          | 0.71                                          | 0.68                                           | 1.35                                           | 2.43                                            |
| HAUS1               | HAUS augmin-like complex,<br>subunit 1                                             | 0.35                                          | 0.79                                          | 1.77                                           | 1.31                                           | 2.03                                            |
| NEK2 <sup>a</sup>   | NIMA (never in mitosis gene a)-<br>related kinase 2                                | 0.99                                          | 0.98                                          | 2.17                                           | 2.48                                           | 2.83                                            |
| CENPV               | centromere protein V                                                               | -0.17                                         | 0.79                                          | 2.66                                           | 3.21                                           | 3.25                                            |
| KIF2C               | kinesin family member 2C                                                           | 0.08                                          | 0.48                                          | 1.81                                           | 1.91                                           | 2.59                                            |
| NDC80 <sup>a</sup>  | NDC80 homolog, kinetochore<br>complex component ( <i>S. cerevisiae</i> )           | 0.48                                          | 1.20                                          | 2.46                                           | 1.94                                           | 3.28                                            |
| NCAPG               | non-SMC condensin I complex,<br>subunit G                                          | -0.48                                         | 1.24                                          | 1.67                                           | 1.63                                           | 2.61                                            |
| CDCA2 <sup>a</sup>  | cell division cycle-associated 2                                                   | -0.17                                         | 0.48                                          | 0.83                                           | 0.98                                           | 2.01                                            |
| LFNG                | LFNG O-fucosylpeptide 3-beta-N-<br>acetylglucosaminyltransferase                   | -1.94                                         | -1.07                                         | -2.24                                          | -1.83                                          | -2.28                                           |
| NUF2                | NUF2, NDC80 kinetochore complex<br>component, homolog<br>( <i>S. cerevisiae</i> )  | 0.47                                          | 1.43                                          | 2.28                                           | 2.47                                           | 3.16                                            |
| CDC2                | cell division cycle 2, G1 to S and G2<br>to M                                      | 0.04                                          | 1.24                                          | 2.58                                           | 2.28                                           | 2.60                                            |
| CLASP2              | cytoplasmic linker associated<br>protein 2                                         | 0.32                                          | 0.39                                          | 0.43                                           | 1.51                                           | 2.46                                            |
| LRRCC1 <sup>a</sup> | leucine rich repeat and coiled-coil<br>domain containing 1                         | 1.05                                          | 2.35                                          | 2.12                                           | 2.36                                           | 2.73                                            |
| KIF18A              | kinesin family member 18 <sup>o</sup>                                              | 0.43                                          | 1.12                                          | 2.70                                           | 2.55                                           | 3.74                                            |
| SPAG5               | sperm associated antigen 5                                                         | 0.35                                          | 0.95                                          | 1.63                                           | 2.08                                           | 2.75                                            |
| BUB1                | budding uninhibited by<br>benzimidazoles 1 homolog (yeast)                         | 1.07                                          | 1.56                                          | 2.14                                           | 2.66                                           | 3.46                                            |
| CKS2                | CDC28 protein kinase regulatory<br>subunit 2                                       | 0.54                                          | 0.52                                          | 1.61                                           | 1.98                                           | 2.25                                            |
| PTTG1               | pituitary tumor-transforming 1                                                     | 0.91                                          | 0.87                                          | 1.70                                           | 1.76                                           | 2.42                                            |
| KPNA2               | karyopherin alpha 2 (RAG cohort 1,<br>importin alpha 1)                            | 0.55                                          | 0.57                                          | 1.00                                           | 1.16                                           | 2.17                                            |
| CEP55               | centrosomal protein 55 kDa                                                         | 0.64                                          | 1.51                                          | 3.00                                           | 2.33                                           | 3.65                                            |
| KIF15               | kinesin family member 15                                                           | 0.08                                          | 1.37                                          | 1.77                                           | 1.81                                           | 2.12                                            |
| NDC80 <sup>a</sup>  | NDC80 homolog, kinetochore<br>complex component ( <i>S. cerevisiae</i> )           | 0.58                                          | 0.83                                          | 1.91                                           | 1.66                                           | 3.16                                            |
| PTTG2               | pituitary tumor-transforming 2                                                     | 0.89                                          | 0.87                                          | 1.87                                           | 1.94                                           | 2.25                                            |
| HAUS6 <sup>a</sup>  | HAUS augmin-like complex,<br>subunit 6                                             | -0.20                                         | 0.88                                          | 0.70                                           | 1.04                                           | 2.05                                            |
| SMC4                | structural maintenance of<br>chromosomes 4                                         | 0.59                                          | 1.65                                          | 2.31                                           | 2.55                                           | 3.43                                            |
| RAD54B              | RAD54 homolog B ( <i>S. cerevisiae</i> )                                           | -0.23                                         | 0.93                                          | 1.32                                           | 1.71                                           | 2.54                                            |
| RAD21               | RAD21 homolog ( <i>S. pombe</i> )                                                  | 0.61                                          | 1.15                                          | 1.51                                           | 1.37                                           | 2.88                                            |
| SPC25               | SPC25, NDC80 kinetochore complex<br>component, homolog<br>( <i>S. cerevisiae</i> ) | -0.07                                         | 1.27                                          | 2.20                                           | 2.06                                           | 2.12                                            |
| MAP9 <sup>a</sup>   | microtubule-associated protein 9                                                   | 0.61                                          | -1.47                                         | -1.44                                          | -2.47                                          | -2.64                                           |
| CDCA8               | cell division cycle associated 8                                                   | 0.05                                          | 0.93                                          | 1.78                                           | 1.86                                           | 3.00                                            |
| CDCA3 <sup>a</sup>  | cell division cycle associated 3                                                   | 0.60                                          | 0.59                                          | 1.84                                           | 2.03                                           | 2.43                                            |
| ANLN                | anillin, actin binding protein                                                     | 1.25                                          | 2.33                                          | 2.20                                           | 2.18                                           | 2.22                                            |
| NEK2 <sup>a</sup>   | NIMA (never in mitosis gene a)<br>-related kinase 2                                | 0.98                                          | 0.82                                          | 1.96                                           | 2.40                                           | 2.86                                            |
| NUMA1               | nuclear mitotic apparatus protein 1                                                | -0.03                                         | -0.50                                         | -0.04                                          | -0.75                                          | -2.09                                           |
| HAUS6 <sup>a</sup>  | HAUS augmin-like complex,<br>subunit 6                                             | -0.14                                         | 1.20                                          | 1.12                                           | 1.36                                           | 2.01                                            |
| PLK1 <sup>a</sup>   | polo-like kinase 1 ( <i>Drosophila</i> )                                           | 1.08                                          | 0.82                                          | 1.91                                           | 2.52                                           | 3.52                                            |

(continued)

SUPPLEMENTARY TABLE S6. (CONTINUED)

| <i>Gene name</i>     | <i>Description</i>                                                                  | <i>cen3tel PD37<br/>versus PD15<br/>logFC</i> | <i>cen3tel PD97<br/>versus PD15<br/>logFC</i> | <i>cen3tel PD167<br/>versus PD15<br/>logFC</i> | <i>cen3tel PD618<br/>versus PD15<br/>logFC</i> | <i>cen3tel PD1034<br/>versus PD15<br/>logFC</i> |
|----------------------|-------------------------------------------------------------------------------------|-----------------------------------------------|-----------------------------------------------|------------------------------------------------|------------------------------------------------|-------------------------------------------------|
| CDC20                | cell division cycle 20 homolog<br>( <i>S. cerevisiae</i> )                          | 0.59                                          | 0.29                                          | 1.96                                           | 2.40                                           | 2.53                                            |
| HSPA2                | heat shock 70kDa protein 2                                                          | 0.45                                          | -0.25                                         | -1.36                                          | -2.91                                          | -3.42                                           |
| PLK1 <sup>a</sup>    | polo-like kinase 1 ( <i>Drosophila</i> )                                            | 0.69                                          | 0.47                                          | 1.56                                           | 2.22                                           | 2.58                                            |
| PRC1                 | protein regulator of cytokinesis 1                                                  | 0.65                                          | 1.00                                          | 1.08                                           | 0.98                                           | 2.12                                            |
| ANAPC7               | anaphase promoting complex<br>subunit 7                                             | 0.71                                          | 0.47                                          | 0.46                                           | 0.33                                           | 3.39                                            |
| KIF11 <sup>a</sup>   | kinesin family member 11                                                            | 0.46                                          | 1.34                                          | 2.51                                           | 2.32                                           | 2.66                                            |
| KIF11 <sup>a</sup>   | kinesin family member 11                                                            | 0.27                                          | 1.21                                          | 2.11                                           | 2.01                                           | 2.63                                            |
| ASPM                 | asp (abnormal spindle) homolog,<br>microcephaly associated<br>( <i>Drosophila</i> ) | 1.30                                          | 1.82                                          | 2.63                                           | 2.13                                           | 3.56                                            |
| PBK                  | PDZ binding kinase                                                                  | 0.81                                          | 1.52                                          | 1.92                                           | 2.47                                           | 3.30                                            |
| LATS2                | LATS, large tumor suppressor,<br>homolog 2 ( <i>Drosophila</i> )                    | 0.00                                          | 0.57                                          | -1.39                                          | -1.53                                          | -2.35                                           |
| HMGA2                | high mobility group AT-hook 2                                                       | -2.69                                         | 1.10                                          | 0.42                                           | 2.63                                           | 2.96                                            |
| NCAPD2               | non-SMC condensin I complex,<br>subunit D2                                          | 0.62                                          | 0.55                                          | 2.05                                           | 2.22                                           | 2.78                                            |
| CCNB2                | cyclin B2                                                                           | 0.56                                          | 0.48                                          | 0.98                                           | 1.47                                           | 2.81                                            |
| KIF20B               | kinesin family member 20B                                                           | 0.92                                          | 1.68                                          | 2.69                                           | 2.84                                           | 3.16                                            |
| OIP5                 | Opa interacting protein 5                                                           | 0.07                                          | 0.63                                          | 1.21                                           | 1.72                                           | 2.19                                            |
| SKA3                 | spindle and kinetochore associated<br>complex subunit 3                             | -0.17                                         | 1.10                                          | 1.11                                           | 1.57                                           | 2.30                                            |
| HAUS6 <sup>a</sup>   | HAUS augmin-like complex,<br>subunit 6                                              | 0.06                                          | 1.14                                          | 1.50                                           | 1.66                                           | 2.99                                            |
| MAP9 <sup>a</sup>    | microtubule-associated protein 9                                                    | 0.87                                          | -1.10                                         | -1.04                                          | -1.68                                          | -2.13                                           |
| AURKA                | aurora kinase A                                                                     | 0.24                                          | 0.63                                          | 1.48                                           | 1.96                                           | 2.63                                            |
| CYP26B1 <sup>a</sup> | cytochrome P450, family 26,<br>subfamily B, polypeptide 1                           | -1.28                                         | -0.31                                         | -1.27                                          | -1.97                                          | -2.41                                           |
| KIF23                | kinesin family member 23                                                            | 0.22                                          | 1.28                                          | 1.40                                           | 1.19                                           | 2.06                                            |
| FAM83D               | family with sequence similarity 83,<br>member D                                     | 1.09                                          | 1.60                                          | 3.09                                           | 3.14                                           | 3.83                                            |
| CLIP1                | CAP-GLY domain containing linker<br>protein 1                                       | 0.22                                          | 0.06                                          | -0.38                                          | -0.80                                          | -2.50                                           |
| PES1                 | pescadillo homolog 1, containing<br>BRCT domain (zebrafish)                         | -0.02                                         | -0.10                                         | 0.02                                           | -0.03                                          | 2.35                                            |
| FANCD2               | Fanconi anemia, complementation<br>group D2                                         | 0.07                                          | 1.07                                          | 1.56                                           | 2.06                                           | 2.51                                            |
| ZWINT                | ZW10 interactor                                                                     | -0.44                                         | 1.29                                          | 2.56                                           | 2.30                                           | 2.70                                            |
| CYP26B1 <sup>a</sup> | cytochrome P450, family 26,<br>subfamily B, polypeptide 1                           | -1.42                                         | -0.49                                         | -1.41                                          | -2.79                                          | -3.30                                           |
| SGOL2                | shugoshin-like 2 ( <i>S. pombe</i> )                                                | 0.36                                          | 1.14                                          | 0.97                                           | 1.53                                           | 2.52                                            |
| LAMC1                | laminin, gamma 1 (formerly<br>LAMB2)                                                | 1.41                                          | 0.67                                          | -0.84                                          | -1.84                                          | -2.07                                           |
| MMP12 <sup>a</sup>   | matrix metalloproteinase 12<br>(macrophage elastase)                                | -4.03                                         | -3.90                                         | -5.33                                          | -5.35                                          | -5.89                                           |
| CCNA2                | cyclin A2                                                                           | 0.44                                          | 0.83                                          | 1.12                                           | 1.19                                           | 2.06                                            |
| FGF7 <sup>a</sup>    | fibroblast growth factor 7<br>(keratinocyte growth factor)                          | -0.50                                         | -0.94                                         | -3.28                                          | -2.94                                          | -3.41                                           |
| VEGFA                | vascular endothelial growth factor A                                                | -1.06                                         | 0.91                                          | -0.68                                          | 0.23                                           | 2.05                                            |
| FGF7 <sup>a</sup>    | fibroblast growth factor 7<br>(keratinocyte growth factor)                          | -0.53                                         | -0.59                                         | -3.88                                          | -3.47                                          | -3.32                                           |
| TIMP1                | TIMP metalloproteinase inhibitor 1                                                  | -0.05                                         | -0.61                                         | -2.05                                          | -2.03                                          | -2.26                                           |
| SERTAD1              | SERTA domain containing 1                                                           | -1.58                                         | -0.20                                         | -1.24                                          | -1.64                                          | -2.50                                           |
| NAP1L1               | nucleosome assembly protein<br>1-like 1                                             | 0.41                                          | 1.23                                          | 1.90                                           | 1.72                                           | 3.11                                            |
| FOXP1                | forkhead box P1                                                                     | -0.58                                         | 0.75                                          | 1.64                                           | 2.21                                           | 2.05                                            |
| BNC1                 | basonuclin 1                                                                        | -0.15                                         | 0.34                                          | -0.90                                          | -1.75                                          | -2.27                                           |
| NGF                  | nerve growth factor (beta<br>polypeptide)                                           | -0.84                                         | 0.73                                          | 0.06                                           | -0.82                                          | -2.25                                           |

(continued)

SUPPLEMENTARY TABLE S6. (CONTINUED)

| <i>Gene name</i>   | <i>Description</i>                                                            | <i>cen3tel PD37<br/>versus PD15<br/>logFC</i> | <i>cen3tel PD97<br/>versus PD15<br/>logFC</i> | <i>cen3tel PD167<br/>versus PD15<br/>logFC</i> | <i>cen3tel PD618<br/>versus PD15<br/>logFC</i> | <i>cen3tel PD1034<br/>versus PD15<br/>logFC</i> |
|--------------------|-------------------------------------------------------------------------------|-----------------------------------------------|-----------------------------------------------|------------------------------------------------|------------------------------------------------|-------------------------------------------------|
| CXCL5 <sup>a</sup> | chemokine (C-X-C motif) ligand 5                                              | -2.00                                         | -1.89                                         | -2.42                                          | -2.14                                          | -3.30                                           |
| KITLG              | KIT ligand                                                                    | -1.18                                         | 0.32                                          | -0.87                                          | -1.53                                          | -2.19                                           |
| FGFR1 <sup>a</sup> | fibroblast growth factor receptor 1                                           | -0.56                                         | 0.17                                          | -1.97                                          | -2.45                                          | -2.81                                           |
| KIT                | v-kit Hardy-Zuckerman 4 feline<br>sarcoma viral oncogene homolog              | 1.37                                          | 1.01                                          | 2.25                                           | -1.14                                          | -2.71                                           |
| OSR2 <sup>a</sup>  | odd-skipped related 2 ( <i>Drosophila</i> )                                   | -1.23                                         | -1.00                                         | -1.15                                          | -2.39                                          | -3.13                                           |
| HES1 <sup>a</sup>  | hairy and enhancer of split 1<br>( <i>Drosophila</i> )                        | 0.12                                          | 1.34                                          | -0.35                                          | -1.91                                          | -2.47                                           |
| LYN                | v-yes-1 Yamaguchi sarcoma viral-<br>related oncogene homolog                  | -0.11                                         | -1.24                                         | -2.22                                          | -2.19                                          | -2.65                                           |
| TNS3               | tensin 3                                                                      | 1.64                                          | -1.09                                         | -4.45                                          | -2.86                                          | -3.16                                           |
| NTN1               | netrin 1                                                                      | 0.09                                          | -2.34                                         | -2.75                                          | -2.86                                          | -3.10                                           |
| PBX1 <sup>a</sup>  | pre-B-cell leukemia homeobox 1                                                | -0.78                                         | -2.26                                         | -2.95                                          | -1.91                                          | -2.78                                           |
| S1PR1              | sphingosine-1-phosphate receptor 1                                            | -1.22                                         | -0.62                                         | -0.07                                          | -1.76                                          | -3.10                                           |
| F3                 | coagulation factor III<br>(thromboplastin, tissue factor)                     | -1.20                                         | 1.76                                          | -0.19                                          | -2.25                                          | -2.17                                           |
| CD40               | CD40 molecule, TNF receptor<br>superfamily member 5                           | -0.11                                         | 0.18                                          | -1.86                                          | -1.92                                          | -2.26                                           |
| ERBB4              | v-erb-a erythroblastic leukemia viral<br>oncogene homolog 4 (avian)           | -0.06                                         | -0.06                                         | -0.01                                          | 1.21                                           | 2.61                                            |
| FABP4              | fatty acid binding protein 4,<br>adipocyte                                    | 0.07                                          | -0.01                                         | -0.21                                          | 3.59                                           | 3.16                                            |
| ADRB2              | adrenergic, beta-2, receptor, surface                                         | -0.80                                         | 1.52                                          | 0.40                                           | -1.79                                          | -2.43                                           |
| FGFR1 <sup>a</sup> | fibroblast growth factor receptor 1                                           | -1.90                                         | -1.24                                         | -2.31                                          | -2.55                                          | -3.29                                           |
| PDGFA              | platelet-derived growth factor alpha<br>polypeptide                           | -0.91                                         | -0.96                                         | -2.08                                          | -1.93                                          | -2.25                                           |
| HES1 <sup>a</sup>  | hairy and enhancer of split 1<br>( <i>Drosophila</i> )                        | -0.33                                         | 1.26                                          | -0.12                                          | -1.97                                          | -3.03                                           |
| NBN                | nibrin                                                                        | -0.02                                         | 0.91                                          | 0.52                                           | 1.22                                           | 2.22                                            |
| PGF                | placental growth factor                                                       | -0.71                                         | -1.51                                         | -1.71                                          | -1.78                                          | -2.24                                           |
| KRAS <sup>a</sup>  | v-Ki-ras2 Kirsten rat sarcoma viral<br>oncogene homolog                       | 0.60                                          | 0.64                                          | 1.03                                           | 1.45                                           | 2.34                                            |
| CCL2               | chemokine (C-C motif) ligand 2                                                | 0.78                                          | 2.55                                          | -1.39                                          | -2.94                                          | -3.73                                           |
| IL6R               | interleukin 6 receptor                                                        | 0.49                                          | -0.22                                         | -1.01                                          | -1.11                                          | -2.29                                           |
| PDGFRB             | platelet-derived growth factor<br>receptor, beta polypeptide                  | 0.48                                          | -1.53                                         | -3.78                                          | -4.45                                          | -4.59                                           |
| MFGE8              | milk fat globule-EGF factor 8 protein                                         | -0.50                                         | 0.78                                          | -1.29                                          | -2.09                                          | -2.76                                           |
| ID4                | inhibitor of DNA binding 4,<br>dominant negative helix-loop-<br>helix protein | 0.87                                          | -1.89                                         | -1.88                                          | -1.93                                          | -2.58                                           |
| NOTCH4             | Notch homolog 4 ( <i>Drosophila</i> )                                         | -0.16                                         | -0.31                                         | -0.22                                          | 0.53                                           | 3.34                                            |
| CLU                | clusterin                                                                     | -0.24                                         | 0.66                                          | -2.62                                          | -2.76                                          | -3.03                                           |
| ADRA2A             | adrenergic, alpha-2-, receptor                                                | 2.19                                          | -0.52                                         | -0.70                                          | -1.74                                          | -2.29                                           |
| CXCL5 <sup>a</sup> | chemokine (C-X-C motif) ligand 5                                              | -4.41                                         | -3.89                                         | -4.05                                          | -4.02                                          | -5.29                                           |
| KGFLP1             | keratinocyte growth factor-like<br>protein 1                                  | -0.56                                         | -0.68                                         | -3.92                                          | -3.38                                          | -3.40                                           |
| CDC7               | cell division cycle 7 homolog<br>( <i>S. cerevisiae</i> )                     | 0.28                                          | 1.17                                          | 1.92                                           | 1.97                                           | 2.73                                            |
| KRAS <sup>a</sup>  | v-Ki-ras2 Kirsten rat sarcoma viral<br>oncogene homolog                       | 0.60                                          | 0.55                                          | 0.92                                           | 1.24                                           | 2.65                                            |
| NRP1               | neuropilin 1                                                                  | -0.27                                         | -1.22                                         | -1.73                                          | -1.80                                          | -2.09                                           |
| TTK                | TTK protein kinase                                                            | 0.29                                          | 1.36                                          | 1.56                                           | 1.99                                           | 3.19                                            |
| PRRX2              | paired related homeobox 2                                                     | -0.69                                         | -1.64                                         | -2.15                                          | -4.45                                          | -4.67                                           |
| CD81               | CD81 molecule                                                                 | -0.08                                         | -0.73                                         | -1.61                                          | -2.04                                          | -2.89                                           |
| OSR2 <sup>a</sup>  | odd-skipped related 2 ( <i>Drosophila</i> )                                   | -1.25                                         | -1.03                                         | -1.10                                          | -2.16                                          | -3.63                                           |
| RPS6KB1            | ribosomal protein S6 kinase, 70 kDa,<br>polypeptide 1                         | 0.80                                          | 0.99                                          | 0.62                                           | 0.98                                           | 2.10                                            |
| FOSL2              | FOS-like antigen 2                                                            | -0.76                                         | -0.26                                         | -0.08                                          | -0.23                                          | -2.03                                           |
| MMP12 <sup>a</sup> | matrix metalloproteinase 12<br>(macrophage elastase)                          | -4.11                                         | -4.05                                         | -5.77                                          | -5.75                                          | -5.99                                           |

(continued)



SUPPLEMENTARY TABLE S6. (CONTINUED)

| <i>Gene name</i>     | <i>Description</i>                                                                             | <i>cen3tel PD37<br/>versus PD15<br/>logFC</i> | <i>cen3tel PD97<br/>versus PD15<br/>logFC</i> | <i>cen3tel PD167<br/>versus PD15<br/>logFC</i> | <i>cen3tel PD618<br/>versus PD15<br/>logFC</i> | <i>cen3tel PD1034<br/>versus PD15<br/>logFC</i> |
|----------------------|------------------------------------------------------------------------------------------------|-----------------------------------------------|-----------------------------------------------|------------------------------------------------|------------------------------------------------|-------------------------------------------------|
| FGFR1 <sup>a</sup>   | fibroblast growth factor receptor 1                                                            | -1.35                                         | -0.43                                         | -2.78                                          | -2.80                                          | -3.07                                           |
| ODC1                 | ornithine decarboxylase 1                                                                      | -1.26                                         | 0.20                                          | 1.06                                           | 1.54                                           | 2.43                                            |
| TCIRG1               | T-cell, immune regulator 1, ATPase,<br>H <sup>+</sup> transporting, lysosomal V0<br>subunit A3 | -0.70                                         | -0.57                                         | -1.11                                          | -1.47                                          | -2.20                                           |
| VEGFC                | vascular endothelial growth factor C                                                           | -2.66                                         | -0.07                                         | -1.99                                          | -2.10                                          | -2.52                                           |
| ADA                  | adenosine deaminase                                                                            | -1.84                                         | -2.08                                         | -2.35                                          | -2.44                                          | -2.31                                           |
| COL18A1 <sup>a</sup> | collagen, type XVIII, alpha 1                                                                  | 0.67                                          | -2.26                                         | -3.08                                          | -3.29                                          | -3.96                                           |
| TP53I11              | tumor protein p53 inducible<br>protein 11                                                      | 0.72                                          | 0.15                                          | -1.65                                          | -2.39                                          | -3.13                                           |
| BDKRB2               | bradykinin receptor B2                                                                         | -0.29                                         | -1.07                                         | -2.23                                          | -2.19                                          | -2.79                                           |
| DHRS2                | dehydrogenase/reductase (SDR<br>family) member 2                                               | -0.16                                         | 2.44                                          | -0.14                                          | 1.02                                           | 2.30                                            |
| SOD2                 | superoxide dismutase 2,<br>mitochondrial                                                       | -0.77                                         | 0.22                                          | -2.24                                          | -0.88                                          | -2.59                                           |
| PPARG                | peroxisome proliferator-activated<br>receptor gamma                                            | 0.84                                          | 0.59                                          | 1.60                                           | 2.76                                           | 2.43                                            |
| WNT2                 | wingless-type MMTV integration<br>site family member 2                                         | -0.59                                         | 0.06                                          | -1.43                                          | -2.31                                          | -2.75                                           |
| ADM                  | adrenomedullin                                                                                 | -0.28                                         | -1.27                                         | -1.88                                          | -3.04                                          | -3.47                                           |
| WISP2                | WNT1 inducible signaling pathway<br>protein 2                                                  | -2.01                                         | -3.01                                         | -3.91                                          | -4.05                                          | -4.40                                           |
| PMP22                | peripheral myelin protein 22                                                                   | 0.00                                          | -0.98                                         | -1.28                                          | -2.80                                          | -2.26                                           |
| IL8                  | interleukin 8                                                                                  | -5.30                                         | 2.92                                          | -4.91                                          | -3.01                                          | -3.77                                           |
| NOX4 <sup>a</sup>    | NADPH oxidase 4                                                                                | -1.67                                         | -2.88                                         | -3.05                                          | -2.81                                          | -3.19                                           |
| IGFBP7               | insulin-like growth factor binding<br>protein 7                                                | 0.22                                          | 2.00                                          | -0.98                                          | -5.25                                          | -5.85                                           |
| EIF2AK2              | eukaryotic translation initiation<br>factor 2-alpha kinase 2                                   | 0.84                                          | 1.39                                          | 1.04                                           | 1.16                                           | 2.08                                            |
| NF2 <sup>a</sup>     | neurofibromin 2 (merlin)                                                                       | -1.35                                         | -1.55                                         | -1.15                                          | -1.86                                          | -2.63                                           |
| DPT <sup>a</sup>     | dermatopontin                                                                                  | 0.33                                          | -2.72                                         | -5.50                                          | -5.41                                          | -5.78                                           |
| F2R                  | coagulation factor II (thrombin)<br>receptor                                                   | -0.30                                         | 1.57                                          | 1.18                                           | 2.05                                           | 2.04                                            |
| FABP3                | fatty acid binding protein 3, muscle<br>and heart (mammary-derived<br>growth inhibitor)        | -0.88                                         | -0.35                                         | -2.10                                          | -2.30                                          | -3.19                                           |
| CDKN2B               | cyclin-dependent kinase inhibitor 2B<br>(p15, inhibits CDK4)                                   | -0.16                                         | 0.66                                          | -2.40                                          | -2.38                                          | -2.75                                           |
| CDKN3                | cyclin-dependent kinase inhibitor 3                                                            | 1.70                                          | 2.03                                          | 2.92                                           | 2.53                                           | 3.05                                            |
| MXD4 <sup>a</sup>    | MAX dimerization protein 4                                                                     | -0.49                                         | -2.00                                         | -2.09                                          | -1.96                                          | -2.00                                           |
| NF2 <sup>a</sup>     | neurofibromin 2 (merlin)                                                                       | -1.14                                         | -1.42                                         | -1.22                                          | -2.14                                          | -2.32                                           |
| IGFBP3 <sup>a</sup>  | insulin-like growth factor binding<br>protein 3                                                | -1.20                                         | -0.94                                         | -2.56                                          | -4.01                                          | -3.93                                           |
| TNFRSF14             | tumor necrosis factor receptor<br>superfamily, member 14<br>(herpesvirus entry mediator)       | 0.53                                          | -1.16                                         | -1.88                                          | -2.25                                          | -2.60                                           |
| NF2 <sup>a</sup>     | neurofibromin 2 (merlin)                                                                       | -1.05                                         | -1.32                                         | -1.15                                          | -2.01                                          | -2.21                                           |
| PTGES                | prostaglandin E synthase                                                                       | -0.52                                         | -0.09                                         | -3.12                                          | -2.89                                          | -3.45                                           |
| CD33 <sup>a</sup>    | CD33 molecule                                                                                  | 0.03                                          | 0.03                                          | -0.05                                          | 1.76                                           | 2.68                                            |
| S100A11 <sup>a</sup> | S100 calcium binding protein A11                                                               | -0.31                                         | 0.17                                          | -0.81                                          | -1.31                                          | -2.42                                           |
| GPNMB                | glycoprotein (transmembrane) nmb                                                               | 0.48                                          | -0.55                                         | -2.60                                          | -1.83                                          | -2.56                                           |
| TENC1                | tensin like C1 domain containing<br>phosphatase (tensin 2)                                     | 0.41                                          | -0.60                                         | -1.62                                          | -1.24                                          | -2.17                                           |
| IL6                  | interleukin 6 (interferon, beta 2)                                                             | 0.13                                          | 3.73                                          | 0.02                                           | -0.83                                          | -2.59                                           |
| SCIN                 | scinderin                                                                                      | 1.93                                          | -1.99                                         | -2.57                                          | -2.38                                          | -3.09                                           |
| CBLB <sup>a</sup>    | Cas-Br-M (murine) ecotropic<br>retroviral transforming<br>sequence b                           | -1.51                                         | -1.27                                         | -1.26                                          | -1.65                                          | -2.89                                           |
| IGFBP3 <sup>a</sup>  | insulin-like growth factor binding<br>protein 3                                                | -0.86                                         | -0.84                                         | -3.68                                          | -4.87                                          | -4.36                                           |

(continued)

SUPPLEMENTARY TABLE S6. (CONTINUED)

| <i>Gene name</i>     | <i>Description</i>                                                                    | <i>cen3tel PD37<br/>versus PD15<br/>logFC</i> | <i>cen3tel PD97<br/>versus PD15<br/>logFC</i> | <i>cen3tel PD167<br/>versus PD15<br/>logFC</i> | <i>cen3tel PD618<br/>versus PD15<br/>logFC</i> | <i>cen3tel PD1034<br/>versus PD15<br/>logFC</i> |
|----------------------|---------------------------------------------------------------------------------------|-----------------------------------------------|-----------------------------------------------|------------------------------------------------|------------------------------------------------|-------------------------------------------------|
| NUPR1                | nuclear protein, transcriptional regulator, 1                                         | 0.66                                          | -0.47                                         | -1.41                                          | -1.19                                          | -2.55                                           |
| NFIB <sup>a</sup>    | nuclear factor I/B                                                                    | 0.33                                          | 2.08                                          | 2.60                                           | 1.53                                           | 2.04                                            |
| CDKN1A <sup>a</sup>  | cyclin-dependent kinase inhibitor 1A (p21, Cip1)                                      | -1.66                                         | -1.07                                         | -2.15                                          | -2.00                                          | -2.54                                           |
| B4GALT1              | UDP-Gal:betaGlcNAc beta 1,4-galactosyltransferase, polypeptide 1                      | -0.52                                         | -0.39                                         | -1.40                                          | -1.64                                          | -2.80                                           |
| NFIB <sup>a</sup>    | nuclear factor I/B                                                                    | 0.13                                          | 1.80                                          | 2.40                                           | 1.30                                           | 2.06                                            |
| THBS1 <sup>a</sup>   | thrombospondin 1                                                                      | 0.79                                          | 0.14                                          | -2.31                                          | -2.74                                          | -2.85                                           |
| CAV2                 | caveolin 2                                                                            | -0.91                                         | -0.55                                         | -2.97                                          | -2.86                                          | -3.21                                           |
| COL18A1 <sup>a</sup> | collagen, type XVIII, alpha 1                                                         | 0.11                                          | -1.17                                         | -1.16                                          | -1.21                                          | -2.09                                           |
| DPT <sup>a</sup>     | dermatopontin                                                                         | -0.04                                         | -1.70                                         | -2.49                                          | -2.63                                          | -3.27                                           |
| TIMP2                | TIMP metalloproteinase inhibitor 2                                                    | 0.04                                          | -0.91                                         | -1.52                                          | -2.05                                          | -3.00                                           |
| KLF4                 | Kruppel-like factor 4 (gut)                                                           | -0.62                                         | 1.18                                          | 0.35                                           | -2.00                                          | -3.36                                           |
| IGFBP5               | insulin-like growth factor binding protein 5                                          | -1.45                                         | -0.73                                         | 0.13                                           | -4.34                                          | -5.18                                           |
| NDN                  | necdin homolog (mouse)                                                                | 0.59                                          | -4.85                                         | -4.72                                          | -4.75                                          | -5.27                                           |
| SESN1 <sup>a</sup>   | sestrin 1                                                                             | -0.05                                         | -0.01                                         | -2.15                                          | -1.93                                          | -2.08                                           |
| GAS1                 | growth arrest-specific 1                                                              | 0.70                                          | -0.48                                         | -0.28                                          | -2.30                                          | -3.92                                           |
| TGFBR3               | transforming growth factor, beta receptor III                                         | 0.19                                          | 0.53                                          | -0.24                                          | -1.35                                          | -2.15                                           |
| THBS1 <sup>a</sup>   | thrombospondin 1                                                                      | 1.21                                          | -0.09                                         | -3.01                                          | -3.26                                          | -3.08                                           |
| RXRA                 | retinoid X receptor, alpha                                                            | -0.29                                         | -0.36                                         | -1.58                                          | -2.59                                          | -2.89                                           |
| GLMN                 | glomulin, FKBP associated protein                                                     | 0.24                                          | 0.34                                          | 0.58                                           | 1.06                                           | 2.19                                            |
| HMOX1                | heme oxygenase (decycling) 1                                                          | -3.06                                         | -3.57                                         | -2.95                                          | -2.66                                          | -3.16                                           |
| PTGS2                | prostaglandin-endoperoxide synthase 2 (prostaglandin G/H synthase and cyclooxygenase) | -1.25                                         | 2.52                                          | 0.98                                           | 0.77                                           | -2.02                                           |
| FGFRL1               | fibroblast growth factor receptor-like 1                                              | 0.01                                          | -1.25                                         | -2.22                                          | -2.59                                          | -3.40                                           |
| CDKN2A <sup>a</sup>  | cyclin-dependent kinase inhibitor 2A (melanoma, p16, inhibits CDK4)                   | -0.24                                         | -1.22                                         | -1.52                                          | -1.71                                          | -2.34                                           |
| GAL                  | galanin prepropeptide                                                                 | -1.14                                         | -2.45                                         | -2.54                                          | -2.71                                          | -3.19                                           |
| VDR                  | vitamin D (1,25-dihydroxyvitamin D3) receptor                                         | -0.81                                         | -0.92                                         | -3.46                                          | -3.23                                          | -3.32                                           |
| S100A11 <sup>a</sup> | S100 calcium binding protein A11                                                      | -0.37                                         | 0.11                                          | -0.77                                          | -1.35                                          | -2.33                                           |
| CDKN1C               | cyclin-dependent kinase inhibitor 1C (p57, Kip2)                                      | 1.23                                          | -1.93                                         | -3.46                                          | -3.29                                          | -4.14                                           |
| IGFBP6               | insulin-like growth factor binding protein 6                                          | 0.97                                          | 1.17                                          | -1.67                                          | -2.11                                          | -2.91                                           |
| CBLB <sup>a</sup>    | Cas-Br-M (murine) ecotropic retroviral transforming sequence b                        | -0.92                                         | -0.84                                         | -0.90                                          | -1.12                                          | -2.32                                           |
| ACVRL1               | activin A receptor type II-like 1                                                     | 0.46                                          | -0.32                                         | -2.30                                          | -2.07                                          | -2.37                                           |
| NOX4 <sup>a</sup>    | NADPH oxidase 4                                                                       | -1.44                                         | -2.42                                         | -2.59                                          | -2.39                                          | -2.74                                           |
| MXD4 <sup>a</sup>    | MAX dimerization protein 4                                                            | 0.23                                          | -1.27                                         | -1.29                                          | -1.44                                          | -2.42                                           |
| CD33 <sup>a</sup>    | CD33 molecule                                                                         | 0.07                                          | 0.22                                          | 0.03                                           | 2.69                                           | 3.43                                            |
| CDKN2A <sup>a</sup>  | cyclin-dependent kinase inhibitor 2A (melanoma, p16, inhibits CDK4)                   | -0.23                                         | -1.86                                         | -2.57                                          | -2.42                                          | -3.07                                           |
| ENG                  | endoglin                                                                              | -0.26                                         | -0.49                                         | -1.79                                          | -2.12                                          | -2.73                                           |
| BMP2                 | bone morphogenetic protein 2                                                          | -1.33                                         | -2.77                                         | -3.01                                          | -2.70                                          | -3.41                                           |
| SMAD1                | SMAD family member 1                                                                  | 1.27                                          | 1.58                                          | 0.85                                           | 0.79                                           | 2.38                                            |
| CDKN1A <sup>a</sup>  | cyclin-dependent kinase inhibitor 1A (p21, Cip1)                                      | -1.02                                         | -0.53                                         | -2.74                                          | -3.14                                          | -4.32                                           |
| CXCL1                | chemokine (C-X-C motif) ligand 1 (melanoma growth stimulating activity, alpha)        | -5.17                                         | 1.20                                          | -5.68                                          | -3.16                                          | -4.75                                           |

(continued)

SUPPLEMENTARY TABLE S6. (CONTINUED)

| <i>Gene name</i>   | <i>Description</i>                                                                | <i>cen3tel PD37<br/>versus PD15<br/>logFC</i> | <i>cen3tel PD97<br/>versus PD15<br/>logFC</i> | <i>cen3tel PD167<br/>versus PD15<br/>logFC</i> | <i>cen3tel PD618<br/>versus PD15<br/>logFC</i> | <i>cen3tel PD1034<br/>versus PD15<br/>logFC</i> |
|--------------------|-----------------------------------------------------------------------------------|-----------------------------------------------|-----------------------------------------------|------------------------------------------------|------------------------------------------------|-------------------------------------------------|
| IFITM1             | interferon induced transmembrane protein 1 (9-27)                                 | -0.69                                         | 1.27                                          | 0.49                                           | -0.92                                          | -3.36                                           |
| CCND2              | cyclin D2                                                                         | -0.32                                         | -0.51                                         | -1.48                                          | -1.35                                          | -2.15                                           |
| CENPE              | centromere protein E, 312 kDa                                                     | 0.44                                          | 0.65                                          | 1.11                                           | 1.07                                           | 2.24                                            |
| PPP1CB             | protein phosphatase 1, catalytic subunit, beta isoform                            | 0.71                                          | 0.99                                          | 0.45                                           | 0.85                                           | 2.18                                            |
| CCND1 <sup>a</sup> | cyclin D1                                                                         | -2.39                                         | -0.99                                         | -2.29                                          | -2.87                                          | -3.92                                           |
| TBX3 <sup>a</sup>  | T-box 3                                                                           | -1.35                                         | -1.17                                         | -2.15                                          | -1.57                                          | -2.31                                           |
| TGFA               | transforming growth factor, alpha                                                 | -1.63                                         | -1.49                                         | -1.83                                          | -1.70                                          | -2.15                                           |
| SMAD6              | SMAD family member 6                                                              | -0.83                                         | -0.59                                         | -1.61                                          | -2.09                                          | -2.90                                           |
| IGF2               | insulin-like growth factor 2 (somatomedin A)                                      | -2.16                                         | -3.41                                         | -3.67                                          | -3.72                                          | -4.21                                           |
| TBX3 <sup>a</sup>  | T-box 3                                                                           | -1.25                                         | -0.98                                         | -2.89                                          | -1.62                                          | -2.55                                           |
| STAT5A             | signal transducer and activator of transcription 5A                               | 0.26                                          | -0.08                                         | -1.86                                          | -1.39                                          | -2.26                                           |
| FOXP1 <sup>a</sup> | forkhead box G1                                                                   | -0.49                                         | -0.42                                         | 4.10                                           | 3.54                                           | 2.72                                            |
| ID2 <sup>a</sup>   | inhibitor of DNA binding 2, dominant negative helix-loop-helix protein            | 0.13                                          | -0.73                                         | -1.31                                          | -3.18                                          | -4.29                                           |
| TCF3               | transcription factor 3 (E2A immunoglobulin enhancer binding factors E12/E47)      | 0.50                                          | 0.43                                          | 1.98                                           | 1.81                                           | 2.18                                            |
| CCND1 <sup>a</sup> | cyclin D1                                                                         | -1.61                                         | -0.20                                         | -2.12                                          | -2.38                                          | -2.77                                           |
| CITED2             | Cbp/p300-interacting transactivator, with Glu/Asp-rich carboxy-terminal domain, 2 | -0.22                                         | 0.83                                          | -0.09                                          | -1.49                                          | -3.42                                           |
| ID2 <sup>a</sup>   | inhibitor of DNA binding 2, dominant negative helix-loop-helix protein            | -0.36                                         | -1.24                                         | -1.64                                          | -3.32                                          | -4.35                                           |
| DLGAP5             | discs, large ( <i>Drosophila</i> ) homolog-associated protein 5                   | 1.75                                          | 2.04                                          | 3.01                                           | 2.91                                           | 4.28                                            |
| NUSAP1             | nucleolar and spindle associated protein 1                                        | 0.55                                          | 1.10                                          | 1.83                                           | 2.16                                           | 2.50                                            |
| BIRC5              | baculoviral IAP repeat-containing 5                                               | 0.54                                          | 0.74                                          | 1.29                                           | 1.92                                           | 2.62                                            |

<sup>a</sup>Indicate genes with more than one probe on the array.

SUPPLEMENTARY TABLE S7. CANCER TESTIS ANTIGENS

| <i>Gene name</i>     | <i>Description</i>                                                            | <i>cen3tel PD37<br/>versus PD15<br/>logFC</i> | <i>cen3tel PD97<br/>versus PD15<br/>logFC</i> | <i>cen3tel PD167<br/>versus PD15<br/>logFC</i> | <i>cen3tel PD618<br/>versus PD15<br/>logFC</i> | <i>cen3tel PD1034<br/>versus PD15<br/>logFC</i> |
|----------------------|-------------------------------------------------------------------------------|-----------------------------------------------|-----------------------------------------------|------------------------------------------------|------------------------------------------------|-------------------------------------------------|
| SSX1                 | synovial sarcoma, X breakpoint 1                                              | NA                                            | 0.08                                          | 0.18                                           | 3.85                                           | 5.39                                            |
| MAGEA1               | melanoma antigen family A, 1<br>(directs expression of antigen<br>MZ2-E)      | NA                                            | 0.02                                          | 0.13                                           | 1.84                                           | 2.91                                            |
| CEP55                | centrosomal protein 55 kDa                                                    | 0.64                                          | 1.51                                          | 3.00                                           | 2.33                                           | 3.65                                            |
| PBK                  | PDZ binding kinase                                                            | 0.81                                          | 1.52                                          | 1.92                                           | 2.47                                           | 3.30                                            |
| SSX4B <sup>a</sup>   | synovial sarcoma, X breakpoint 4B                                             | -0.01                                         | 0.18                                          | 0.18                                           | 3.68                                           | 4.38                                            |
| TTK                  | TTK protein kinase                                                            | 0.29                                          | 1.36                                          | 1.56                                           | 1.99                                           | 3.19                                            |
| SSX4B <sup>a</sup>   | synovial sarcoma, X breakpoint 4B                                             | 0.04                                          | 0.03                                          | 0.07                                           | 3.46                                           | 4.36                                            |
| TMEFF2               | transmembrane protein with EGF-<br>like and two follistatin-like<br>domains 2 | 0.31                                          | 0.75                                          | 0.93                                           | 2.25                                           | 2.70                                            |
| PAGE1                | P antigen family, member 1<br>(prostate associated)                           | -0.06                                         | 0.04                                          | 0.01                                           | 1.88                                           | 4.87                                            |
| FAM133A <sup>a</sup> | family with sequence similarity 133,<br>member A                              | 0.74                                          | -0.02                                         | -0.03                                          | 1.05                                           | 4.22                                            |
| ATAD2 <sup>a</sup>   | ATPase family, AAA domain<br>containing 2                                     | -0.56                                         | 1.38                                          | 1.83                                           | 1.74                                           | 1.52                                            |
| OIP5                 | Opa interacting protein 5                                                     | 0.07                                          | 0.63                                          | 1.21                                           | 1.72                                           | 2.19                                            |
| CASC5 <sup>a</sup>   | cancer susceptibility candidate 5                                             | 0.40                                          | 0.91                                          | 1.03                                           | 1.04                                           | 1.70                                            |
| SPANXA1 <sup>a</sup> | sperm protein associated with the<br>nucleus, X-linked, family member<br>A1   | -0.16                                         | 0.03                                          | 0.09                                           | 2.99                                           | 1.98                                            |
| SPAG9                | sperm associated antigen 9                                                    | 0.78                                          | 1.34                                          | 0.97                                           | 0.86                                           | 0.96                                            |
| MAGEA2B              | melanoma antigen family A, 2B                                                 | -0.08                                         | 0.04                                          | 0.08                                           | 1.20                                           | 3.66                                            |
| SSX3                 | synovial sarcoma, X breakpoint 3                                              | -0.04                                         | -0.04                                         | -0.02                                          | 1.26                                           | 3.69                                            |
| FAM133A <sup>a</sup> | family with sequence similarity 133,<br>member A                              | 0.59                                          | -0.08                                         | -0.11                                          | 0.86                                           | 3.23                                            |
| SPANXD               | SPANX family, member D                                                        | 0.00                                          | 0.07                                          | 0.12                                           | 2.66                                           | 1.52                                            |
| SSX7                 | synovial sarcoma, X breakpoint 7                                              | 0.10                                          | 0.06                                          | 0.00                                           | 1.39                                           | 2.71                                            |
| SPANXB2              | SPANX family, member B2                                                       | -0.06                                         | 0.02                                          | 0.04                                           | 2.88                                           | 0.96                                            |
| MAGEA12              | melanoma antigen family A, 12                                                 | -0.03                                         | -0.10                                         | 0.11                                           | 0.91                                           | 2.92                                            |
| LDHC                 | lactate dehydrogenase C                                                       | -0.22                                         | 0.38                                          | 1.00                                           | 1.03                                           | 1.35                                            |
| CEP290 <sup>a</sup>  | centrosomal protein 290 kDa                                                   | 0.19                                          | 0.98                                          | 0.20                                           | 0.53                                           | 1.44                                            |
| CASC5 <sup>a</sup>   | cancer susceptibility candidate 5                                             | 0.00                                          | 0.60                                          | 0.42                                           | 0.82                                           | 1.30                                            |
| PAGE5                | P antigen family, member 5<br>(prostate associated)                           | -0.09                                         | 0.01                                          | 0.02                                           | 0.37                                           | 2.77                                            |
| CCDC62               | coiled-coil domain containing 62                                              | -0.12                                         | 0.93                                          | -0.04                                          | 1.09                                           | 1.20                                            |
| PLAC1                | placenta-specific 1                                                           | -0.06                                         | 0.19                                          | -0.03                                          | 0.73                                           | 2.09                                            |
| SPANXA1 <sup>a</sup> | sperm protein associated with the<br>nucleus, X-linked, family<br>member A1   | -0.12                                         | 0.00                                          | 0.07                                           | 1.86                                           | 1.07                                            |
| PAGE2B               | P antigen family, member 2B                                                   | -0.04                                         | 0.07                                          | -0.01                                          | 0.38                                           | 2.43                                            |
| ATAD2 <sup>a</sup>   | ATPase family, AAA domain<br>containing 2                                     | -0.18                                         | 0.27                                          | 0.56                                           | 0.46                                           | 1.68                                            |
| CEP290 <sup>a</sup>  | centrosomal protein 290 kDa                                                   | 0.05                                          | 0.72                                          | -0.01                                          | 0.36                                           | 1.59                                            |
| LUZP4                | leucine zipper protein 4                                                      | 0.02                                          | -0.10                                         | 0.03                                           | 1.86                                           | 0.88                                            |
| PAGE2                | P antigen family, member 2<br>(prostate associated)                           | -0.11                                         | 0.02                                          | 0.05                                           | 0.16                                           | 2.43                                            |
| SSX9                 | synovial sarcoma, X breakpoint 9                                              | 0.08                                          | 0.03                                          | 0.03                                           | 1.44                                           | 0.93                                            |
| CT47A11 <sup>a</sup> | cancer/testis antigen family 47,<br>member A11                                | -0.06                                         | -0.06                                         | 0.01                                           | 0.28                                           | 2.27                                            |
| MAGEA4               | melanoma antigen family A, 4                                                  | 0.02                                          | 0.02                                          | 0.06                                           | 0.36                                           | 1.94                                            |
| MAGEA6               | melanoma antigen family A, 6                                                  | 0.01                                          | -0.09                                         | -0.05                                          | 0.29                                           | 2.17                                            |
| CT47A11 <sup>a</sup> | cancer/testis antigen family 47,<br>member A11                                | -0.17                                         | 0.01                                          | 0.18                                           | 0.29                                           | 1.97                                            |
| XAGE3                | X antigen family, member 3                                                    | 0.03                                          | 0.10                                          | 0.15                                           | 0.20                                           | 1.76                                            |
| CSAG1                | chondrosarcoma associated gene 1                                              | 0.00                                          | -0.10                                         | -0.13                                          | 0.28                                           | 2.14                                            |
| CSAG2 <sup>a</sup>   | CSAG family, member 2                                                         | 0.06                                          | 0.05                                          | 0.00                                           | 0.28                                           | 1.71                                            |
| LY6K                 | lymphocyte antigen 6 complex,<br>locus K                                      | -0.84                                         | 1.08                                          | 1.35                                           | 0.70                                           | -0.24                                           |

(continued)

SUPPLEMENTARY TABLE S7. (CONTINUED)

| <i>Gene name</i>   | <i>Description</i>                                 | <i>cen3tel PD37<br/>versus PD15<br/>logFC</i> | <i>cen3tel PD97<br/>versus PD15<br/>logFC</i> | <i>cen3tel PD167<br/>versus PD15<br/>logFC</i> | <i>cen3tel PD618<br/>versus PD15<br/>logFC</i> | <i>cen3tel PD1034<br/>versus PD15<br/>logFC</i> |
|--------------------|----------------------------------------------------|-----------------------------------------------|-----------------------------------------------|------------------------------------------------|------------------------------------------------|-------------------------------------------------|
| CSAG2 <sup>a</sup> | CSAG family, member 2                              | 0.00                                          | -0.07                                         | 0.00                                           | 0.28                                           | 1.68                                            |
| MAGEC1             | melanoma antigen family C, 1                       | -0.06                                         | 0.44                                          | 0.02                                           | -0.02                                          | 1.47                                            |
| CT47B1             | cancer/testis antigen family 147,<br>member B1     | -0.07                                         | -0.04                                         | -0.09                                          | 0.12                                           | 1.59                                            |
| GAGE7              | G antigen 7                                        | -0.01                                         | -0.01                                         | -0.01                                          | 0.16                                           | 1.38                                            |
| SPAG4              | sperm associated antigen 4                         | -0.24                                         | 1.21                                          | -0.21                                          | 0.93                                           | -0.30                                           |
| TSGA10             | testis specific, 10                                | 0.16                                          | 1.71                                          | -0.39                                          | -0.04                                          | -0.07                                           |
| CTAGE1             | cutaneous T-cell lymphoma-<br>associated antigen 1 | -0.12                                         | 1.23                                          | 0.12                                           | 0.10                                           | -0.01                                           |
| CPXCR1             | CPX chromosome region,<br>candidate 1              | 0.09                                          | -0.06                                         | 0.06                                           | 0.02                                           | 1.02                                            |

<sup>a</sup>Indicate genes with more than one probe on the array.

SUPPLEMENTARY TABLE S8. LIST OF GENES INVOLVED INTO NEGATIVE REGULATION OF PROGRAMMED CELL DEATH

| Gene name             | Description                                                                      | <i>cen3tel PD37</i>     | <i>cen3tel PD97</i>     | <i>cen3tel PD167</i>    | <i>cen3tel PD618</i>    | <i>cen3tel PD1034</i>   |
|-----------------------|----------------------------------------------------------------------------------|-------------------------|-------------------------|-------------------------|-------------------------|-------------------------|
|                       |                                                                                  | <i>vs PD15</i><br>logFC |
| SPHK1                 | sphingosine kinase 1                                                             | -2.21                   | -0.46                   | -1.47                   | -0.76                   | -1.22                   |
| NEFL <sup>a</sup>     | neurofilament, light polypeptide                                                 | 0.43                    | 5.15                    | 0.38                    | 0.98                    | 0.31                    |
| NR4A2                 | nuclear receptor subfamily 4, group A, member 2                                  | -0.03                   | 2.32                    | 1.24                    | 0.27                    | -0.18                   |
| PRDX2 <sup>a</sup>    | peroxiredoxin 2                                                                  | -0.22                   | -2.00                   | -0.15                   | -0.60                   | -1.32                   |
| BNIP3                 | BCL2/adenovirus E1B 19 kDa interacting protein 3                                 | 0.12                    | 2.46                    | -0.28                   | 1.96                    | 1.33                    |
| PRDX2 <sup>a</sup>    | peroxiredoxin 2                                                                  | -0.17                   | -2.26                   | -0.15                   | -0.54                   | -1.67                   |
| NEFL <sup>a</sup>     | neurofilament, light polypeptide                                                 | -0.06                   | 2.85                    | 0.05                    | 0.23                    | -0.23                   |
| BDNF <sup>a</sup>     | brain-derived neurotrophic factor                                                | -0.07                   | 1.48                    | 2.82                    | 0.29                    | -0.29                   |
| BDNF <sup>a</sup>     | brain-derived neurotrophic factor                                                | 0.65                    | 2.31                    | 3.28                    | 1.04                    | 0.96                    |
| IL7                   | interleukin 7                                                                    | -0.58                   | -1.96                   | -3.05                   | -1.14                   | -1.35                   |
| ANXA1                 | annexin A1                                                                       | -0.27                   | 0.24                    | -0.47                   | -2.07                   | -1.40                   |
| FAS                   | Fas (TNF receptor superfamily, member 6)                                         | -0.53                   | 0.89                    | -2.22                   | -2.04                   | -1.26                   |
| ASNS                  | asparagine synthetase                                                            | 1.91                    | 3.01                    | 1.70                    | 2.05                    | 1.85                    |
| SERPINB2 <sup>a</sup> | serpin peptidase inhibitor, clade B (ovalbumin), member 2                        | -2.98                   | 0.00                    | -2.18                   | -3.54                   | -4.17                   |
| BDKRB2                | bradykinin receptor B2                                                           | -0.29                   | -1.07                   | -2.23                   | -2.19                   | -2.79                   |
| DHRS2                 | dehydrogenase/reductase (SDR family) member 2                                    | -0.16                   | 2.44                    | -0.14                   | 1.02                    | 2.30                    |
| SOD2                  | superoxide dismutase 2, mitochondrial                                            | -0.77                   | 0.22                    | -2.24                   | -0.88                   | -2.59                   |
| G2E3 <sup>a</sup>     | G2/M-phase specific E3 ubiquitin ligase                                          | 0.52                    | 1.17                    | 1.41                    | 1.23                    | 2.21                    |
| CASP2 <sup>a</sup>    | caspase 2, apoptosis-related cysteine peptidase                                  | -0.85                   | 0.22                    | -0.52                   | -1.63                   | -3.18                   |
| CRYAB                 | crystallin, alpha B                                                              | 0.47                    | -0.53                   | -1.24                   | -2.34                   | -3.82                   |
| VEGFA                 | vascular endothelial growth factor A                                             | -1.06                   | 0.91                    | -0.68                   | 0.23                    | 2.05                    |
| EYA1                  | eyes absent homolog 1 ( <i>Drosophila</i> )                                      | 1.32                    | -0.21                   | -0.18                   | 0.72                    | 2.73                    |
| TBX3 <sup>a</sup>     | T-box 3                                                                          | -1.25                   | -0.98                   | -2.89                   | -1.62                   | -2.55                   |
| ATG5                  | ATG5 autophagy related 5 homolog ( <i>S. cerevisiae</i> )                        | 0.94                    | 1.14                    | 0.77                    | 1.27                    | 2.44                    |
| GDNF                  | glial cell derived neurotrophic factor                                           | -1.38                   | -0.54                   | -0.07                   | -0.92                   | -2.00                   |
| F2R                   | coagulation factor II (thrombin) receptor                                        | -0.30                   | 1.57                    | 1.18                    | 2.05                    | 2.04                    |
| NGF                   | nerve growth factor (beta polypeptide)                                           | -0.84                   | 0.73                    | 0.06                    | -0.82                   | -2.25                   |
| FURIN                 | furin (paired basic amino acid cleaving enzyme)                                  | -0.87                   | -0.91                   | -2.14                   | -2.00                   | -3.00                   |
| DAPK1                 | death-associated protein kinase 1                                                | 2.10                    | 1.25                    | 1.77                    | -2.03                   | -2.85                   |
| SOCS2 <sup>a</sup>    | suppressor of cytokine signaling 2                                               | 0.07                    | 0.18                    | -1.60                   | -2.45                   | -2.61                   |
| KIT                   | v-kit Hardy-Zuckerman 4 feline sarcoma viral oncogene homolog                    | 1.37                    | 1.01                    | 2.25                    | -1.14                   | -2.71                   |
| CDC2                  | cell division cycle 2, G1 to S and G2 to M                                       | 0.04                    | 1.24                    | 2.58                    | 2.28                    | 2.60                    |
| TWIST2                | twist homolog 2 ( <i>Drosophila</i> )                                            | 1.00                    | -0.26                   | -1.76                   | -2.19                   | -2.76                   |
| AKT1S1                | AKT1 substrate 1 (proline-rich)                                                  | -0.77                   | -0.87                   | -0.80                   | -0.90                   | -2.51                   |
| SOCS3                 | suppressor of cytokine signaling 3                                               | -0.78                   | -0.55                   | -1.42                   | -1.44                   | -2.74                   |
| PRLR <sup>a</sup>     | prolactin receptor                                                               | -1.97                   | -2.46                   | -3.19                   | -2.56                   | -2.55                   |
| BIRC3                 | baculoviral IAP repeat-containing 3                                              | -2.45                   | 2.12                    | -1.23                   | -1.22                   | -2.58                   |
| COMP <sup>a</sup>     | cartilage oligomeric matrix protein                                              | 0.31                    | -2.96                   | -3.03                   | -2.91                   | -3.64                   |
| IGF2                  | insulin-like growth factor 2 (somatomedin A)                                     | -2.16                   | -3.41                   | -3.67                   | -3.72                   | -4.21                   |
| IL6                   | interleukin 6 (interferon, beta 2)                                               | 0.13                    | 3.73                    | 0.02                    | -0.83                   | -2.59                   |
| TAF9B <sup>a</sup>    | TAF9B RNA polymerase II, TATA box binding protein (TBP)-associated factor, 31kDa | 0.53                    | 0.14                    | 0.57                    | 0.64                    | 3.01                    |
| F3                    | coagulation factor III (thromboplastin, tissue factor)                           | -1.20                   | 1.76                    | -0.19                   | -2.25                   | -2.17                   |
| STAT5A                | signal transducer and activator of transcription 5 <sup>o</sup>                  | 0.26                    | -0.08                   | -1.86                   | -1.39                   | -2.26                   |

(continued)

SUPPLEMENTARY TABLE S8. (CONTINUED)

| <i>Gene name</i>      | <i>Description</i>                                                                      | <i>cen3tel PD37<br/>vs PD15<br/>logFC</i> | <i>cen3tel PD97<br/>vs PD15<br/>logFC</i> | <i>cen3tel PD167<br/>vs PD15<br/>logFC</i> | <i>cen3tel PD618<br/>vs PD15<br/>logFC</i> | <i>cen3tel PD1034<br/>vs PD15<br/>logFC</i> |
|-----------------------|-----------------------------------------------------------------------------------------|-------------------------------------------|-------------------------------------------|--------------------------------------------|--------------------------------------------|---------------------------------------------|
| CLCF1                 | cardiotrophin-like cytokine factor 1                                                    | -1.07                                     | 0.20                                      | 0.03                                       | -1.19                                      | -2.35                                       |
| CITED2                | Cbp/p300-interacting transactivator,<br>with Glu/Asp-rich carboxy-terminal<br>domain, 2 | -0.22                                     | 0.83                                      | -0.09                                      | -1.49                                      | -3.42                                       |
| CDKN1A <sup>a</sup>   | cyclin-dependent kinase inhibitor 1A<br>(p21, Cip1)                                     | -1.66                                     | -1.07                                     | -2.15                                      | -2.00                                      | -2.54                                       |
| BIRC5                 | baculoviral IAP repeat-containing 5                                                     | 0.54                                      | 0.74                                      | 1.29                                       | 1.92                                       | 2.62                                        |
| THBS1 <sup>a</sup>    | thrombospondin 1                                                                        | 0.79                                      | 0.14                                      | -2.31                                      | -2.74                                      | -2.85                                       |
| SFRP1 <sup>a</sup>    | secreted frizzled-related protein 1                                                     | 0.14                                      | -2.65                                     | -1.65                                      | -3.79                                      | -4.63                                       |
| GRIK2                 | glutamate receptor, ionotropic,<br>kainate 2                                            | 1.06                                      | 0.86                                      | -1.74                                      | -2.14                                      | -2.20                                       |
| KRAS <sup>a</sup>     | v-Ki-ras2 Kirsten rat sarcoma viral<br>oncogene homolog                                 | 0.60                                      | 0.64                                      | 1.03                                       | 1.45                                       | 2.34                                        |
| CCL2                  | chemokine (C-C motif) ligand 2                                                          | 0.78                                      | 2.55                                      | -1.39                                      | -2.94                                      | -3.73                                       |
| TBX3 <sup>a</sup>     | T-box 3                                                                                 | -1.35                                     | -1.17                                     | -2.15                                      | -1.57                                      | -2.31                                       |
| SFRP1 <sup>a</sup>    | secreted frizzled-related protein 1                                                     | 0.12                                      | -2.53                                     | -1.69                                      | -3.69                                      | -4.80                                       |
| G2E3 <sup>a</sup>     | G2/M-phase specific E3 ubiquitin<br>ligase                                              | 0.33                                      | 1.39                                      | 1.15                                       | 0.98                                       | 2.10                                        |
| HSPD1 <sup>a</sup>    | heat-shock 60 kDa protein 1<br>(chaperonin)                                             | -0.42                                     | 0.72                                      | 1.21                                       | 1.91                                       | 2.61                                        |
| GCLM                  | glutamate-cysteine ligase, modifier<br>subunit                                          | -0.42                                     | 0.02                                      | 0.79                                       | 1.25                                       | 2.72                                        |
| THBS1 <sup>a</sup>    | thrombospondin 1                                                                        | 1.21                                      | -0.09                                     | -3.01                                      | -3.26                                      | -3.08                                       |
| CEBPB                 | CCAAT/enhancer binding protein (C/<br>EBP), beta                                        | -1.31                                     | -1.30                                     | -2.19                                      | -2.22                                      | -3.42                                       |
| HMOX1                 | heme oxygenase (decycling) 1                                                            | -3.06                                     | -3.57                                     | -2.95                                      | -2.66                                      | -3.16                                       |
| CLU                   | clusterin                                                                               | -0.24                                     | 0.66                                      | -2.62                                      | -2.76                                      | -3.03                                       |
| PRLR <sup>a</sup>     | prolactin receptor                                                                      | -2.29                                     | -2.11                                     | -2.94                                      | -2.49                                      | -3.10                                       |
| SERPINB2 <sup>a</sup> | serpin peptidase inhibitor, clade B<br>(ovalbumin), member 2                            | -2.75                                     | -0.09                                     | -2.04                                      | -3.20                                      | -4.16                                       |
| HTATIP2               | HIV-1 Tat interactive protein 2, 30 kDa                                                 | 0.92                                      | 0.11                                      | -0.81                                      | -1.54                                      | -3.43                                       |
| PEA15 <sup>a</sup>    | phosphoprotein enriched in<br>astrocytes 15                                             | -0.15                                     | 0.08                                      | -0.83                                      | -1.37                                      | -2.78                                       |
| SORT1                 | sortilin 1                                                                              | 0.22                                      | 0.65                                      | 1.52                                       | -1.72                                      | -2.35                                       |
| KRAS <sup>a</sup>     | v-Ki-ras2 Kirsten rat sarcoma viral<br>oncogene homolog                                 | 0.60                                      | 0.55                                      | 0.92                                       | 1.24                                       | 2.65                                        |
| ARHGDI1A              | Rho GDP dissociation inhibitor (GDI)<br>alpha                                           | -0.53                                     | -0.51                                     | -0.32                                      | -0.14                                      | -2.06                                       |
| HSPD1 <sup>a</sup>    | heat shock 60 kDa protein 1<br>(chaperonin)                                             | 0.14                                      | 0.54                                      | 0.85                                       | 1.73                                       | 3.35                                        |
| SMAD6                 | SMAD family member 6                                                                    | -0.83                                     | -0.59                                     | -1.61                                      | -2.09                                      | -2.90                                       |
| PPT1 <sup>a</sup>     | palmitoyl-protein thioesterase 1                                                        | 1.08                                      | 0.55                                      | 1.36                                       | 1.36                                       | 2.47                                        |
| BCL2A1                | BCL2-related protein A1                                                                 | -0.17                                     | -1.49                                     | -2.69                                      | -2.46                                      | -3.07                                       |
| SOCS2 <sup>a</sup>    | suppressor of cytokine signaling 2                                                      | -0.07                                     | 0.06                                      | -1.74                                      | -2.21                                      | -2.80                                       |
| COMP <sup>a</sup>     | cartilage oligomeric matrix protein                                                     | 0.26                                      | -2.32                                     | -2.46                                      | -2.47                                      | -3.20                                       |
| PPT1 <sup>a</sup>     | palmitoyl-protein thioesterase 1                                                        | 1.28                                      | 0.66                                      | 1.23                                       | 0.92                                       | 2.63                                        |
| CASP2 <sup>a</sup>    | caspase 2, apoptosis-related cysteine<br>peptidase                                      | -0.48                                     | 0.73                                      | -0.07                                      | -1.37                                      | -3.35                                       |
| TAF9B <sup>a</sup>    | TAF9B RNA polymerase II, TATA box<br>binding protein (TBP)-associated<br>factor, 31 kDa | 0.65                                      | 0.33                                      | 1.70                                       | 1.22                                       | 2.49                                        |
| MSH2                  | mutS homolog 2, colon cancer,<br>nonpolyposis type 1 ( <i>E. coli</i> )                 | 0.03                                      | 1.50                                      | 1.99                                       | 2.04                                       | 2.56                                        |
| ADA                   | adenosine deaminase                                                                     | -1.84                                     | -2.08                                     | -2.35                                      | -2.44                                      | -2.31                                       |
| CDKN1A <sup>a</sup>   | cyclin-dependent kinase inhibitor 1A<br>(p21, Cip1)                                     | -1.02                                     | -0.53                                     | -2.74                                      | -3.14                                      | -4.32                                       |
| TNFAIP3               | tumor necrosis factor, alpha-induced<br>protein 3                                       | -1.72                                     | 3.19                                      | -0.53                                      | -0.51                                      | -2.52                                       |
| PEA15 <sup>a</sup>    | phosphoprotein enriched in astrocytes<br>15                                             | -0.12                                     | 0.02                                      | -0.98                                      | -1.37                                      | -2.49                                       |

<sup>a</sup>Indicate genes with more than one probe on the array.

SUPPLEMENTARY TABLE S9. LIST OF GENES BELONGING TO THE HAN\_SATB1\_TARGETS\_DN GENESET

| <i>Gene name</i> | <i>Description</i>                                                                          | <i>cen3tel PD37<br/>versus PD15<br/>logFC</i> | <i>cen3tel PD97<br/>versus PD15<br/>logFC</i> | <i>cen3tel PD167<br/>versus PD15<br/>logFC</i> | <i>cen3tel PD618<br/>versus PD15<br/>logFC</i> | <i>cen3tel PD1034<br/>versus PD15<br/>logFC</i> |
|------------------|---------------------------------------------------------------------------------------------|-----------------------------------------------|-----------------------------------------------|------------------------------------------------|------------------------------------------------|-------------------------------------------------|
| IL6              | interleukin 6 (interferon, beta 2)                                                          | 0.13                                          | 3.73                                          | 0.02                                           | -0.83                                          | -2.59                                           |
| KLF5             | Kruppel-like factor 5 (intestinal)                                                          | 1.43                                          | 3.54                                          | 0.34                                           | 0.91                                           | 0.02                                            |
| F2RL2            | coagulation factor II (thrombin)<br>receptor-like 2                                         | 0.08                                          | 3.15                                          | 1.67                                           | 1.96                                           | 1.90                                            |
| IL8              | interleukin 8                                                                               | -5.30                                         | 2.92                                          | -4.91                                          | -3.01                                          | -3.77                                           |
| SLC7A11          | solute carrier family 7, (cationic<br>amino acid transporter,<br>y + system) member 11      | 0.71                                          | 2.63                                          | 1.87                                           | 0.61                                           | 1.15                                            |
| OAS1             | 2',5'-oligoadenylate synthetase 1,<br>40/46 kDa                                             | -1.41                                         | 2.62                                          | 1.61                                           | 1.16                                           | -1.60                                           |
| EMR1             | egf-like module containing, mucin-<br>like, hormone receptor-like 1                         | -0.07                                         | 2.60                                          | 2.88                                           | 3.28                                           | 4.14                                            |
| CCL2             | chemokine (C-C motif) ligand 2                                                              | 0.78                                          | 2.55                                          | -1.39                                          | -2.94                                          | -3.73                                           |
| PTGS2            | prostaglandin-endoperoxide<br>synthase 2 (prostaglandin G/H<br>synthase and cyclooxygenase) | -1.25                                         | 2.52                                          | 0.98                                           | 0.77                                           | -2.02                                           |
| DNAJB4           | DnaJ (Hsp40) homolog, subfamily B,<br>member 4                                              | 0.18                                          | 2.19                                          | 0.68                                           | 0.08                                           | 1.17                                            |
| OAS3             | 2'-5'-oligoadenylate synthetase 3,<br>100 kDa                                               | -0.82                                         | 2.49                                          | 1.60                                           | 1.41                                           | -0.61                                           |
| AK3L1            | adenylate kinase 3-like 1                                                                   | -0.48                                         | 2.21                                          | 1.16                                           | 1.85                                           | 1.89                                            |
| BNIP3            | BCL2/adenovirus E1B 19 kDa<br>interacting protein 3                                         | 0.12                                          | 2.46                                          | -0.28                                          | 1.96                                           | 1.33                                            |
| MX2              | myxovirus (influenza virus)<br>resistance 2 (mouse)                                         | -1.14                                         | 2.30                                          | -0.01                                          | -0.38                                          | -2.04                                           |
| BDNF             | brain-derived neurotrophic factor                                                           | 0.65                                          | 2.31                                          | 3.28                                           | 1.04                                           | 0.96                                            |
| APOL3            | apolipoprotein L, 3                                                                         | 1.28                                          | 2.29                                          | 0.25                                           | 0.58                                           | 0.04                                            |
| INHBA            | inhibin, beta A                                                                             | -2.18                                         | 2.25                                          | 1.09                                           | 0.55                                           | 0.60                                            |
| IFIT3            | interferon-induced protein with<br>tetratricopeptide repeats 3                              | -0.71                                         | 2.13                                          | 1.30                                           | 2.14                                           | -0.24                                           |
| STXBP6           | syntaxin binding protein 6 (amisyn)                                                         | -0.38                                         | 2.05                                          | 1.38                                           | 0.65                                           | 0.84                                            |
| ANKRD1           | ankyrin repeat domain 1 (cardiac<br>muscle)                                                 | -1.36                                         | 2.04                                          | 1.67                                           | 0.97                                           | 0.08                                            |
| QPCT             | glutaminyl-peptide cyclotransferase                                                         | -0.18                                         | -2.15                                         | -2.55                                          | -2.62                                          | -3.11                                           |
| IL13RA2          | interleukin 13 receptor, alpha 2                                                            | -2.63                                         | -2.17                                         | -3.83                                          | -3.09                                          | -3.21                                           |



SUPPLEMENTARY TABLE S10. LIST OF GENES BELONGING  
TO THE WINNEPENNINCKX\_MELANOMA\_METASTASIS\_UP GENESET

| <i>Gene name</i> | <i>Description</i>                                                                                   | <i>cen3tel PD37<br/>versus PD15<br/>logFC</i> | <i>cen3tel PD97<br/>versus PD15<br/>logFC</i> | <i>cen3tel PD167<br/>versus PD15<br/>logFC</i> | <i>cen3tel PD618<br/>versus PD15<br/>logFC</i> | <i>cen3tel PD1034<br/>versus PD15<br/>logFC</i> |
|------------------|------------------------------------------------------------------------------------------------------|-----------------------------------------------|-----------------------------------------------|------------------------------------------------|------------------------------------------------|-------------------------------------------------|
| DLGAP5           | discs, large ( <i>Drosophila</i> ) homolog-associated protein 5                                      | 1.75                                          | 2.04                                          | 3.01                                           | 2.91                                           | 4.28                                            |
| CEP55            | centrosomal protein 55 kDa                                                                           | 0.64                                          | 1.51                                          | 3.00                                           | 2.33                                           | 3.65                                            |
| ASPM             | asp (abnormal spindle) homolog, microcephaly associated ( <i>Drosophila</i> )                        | 1.30                                          | 1.82                                          | 2.63                                           | 2.13                                           | 3.56                                            |
| DHFR             | dihydrofolate reductase                                                                              | 0.35                                          | 0.63                                          | 0.67                                           | 0.40                                           | 3.53                                            |
| BUB1             | budding uninhibited by benzimidazoles 1 homolog (yeast)                                              | 1.07                                          | 1.56                                          | 2.14                                           | 2.66                                           | 3.46                                            |
| HSPD1            | heat shock 60 kDa protein 1 (chaperonin)                                                             | -0.42                                         | 0.72                                          | 1.21                                           | 1.91                                           | 2.61                                            |
| NDC80            | NDC80 homolog, kinetochore complex component ( <i>S. cerevisiae</i> )                                | 0.48                                          | 1.20                                          | 2.46                                           | 1.94                                           | 3.28                                            |
| C12ORF48         | chromosome 12 open reading frame 48                                                                  | 0.62                                          | 1.08                                          | 1.62                                           | 1.78                                           | 3.17                                            |
| NUF2             | NUF2, NDC80 kinetochore complex component, homolog ( <i>S. cerevisiae</i> )                          | 0.47                                          | 1.43                                          | 2.28                                           | 2.47                                           | 3.16                                            |
| CDKN3            | cyclin-dependent kinase inhibitor 3                                                                  | 1.70                                          | 2.03                                          | 2.92                                           | 2.53                                           | 3.05                                            |
| ECT2             | epithelial cell transforming sequence 2 oncogene                                                     | 0.73                                          | 1.71                                          | 1.81                                           | 1.73                                           | 3.04                                            |
| CDCA8            | cell division cycle associated 8                                                                     | 0.05                                          | 0.93                                          | 1.78                                           | 1.86                                           | 3.00                                            |
| CCNB1            | cyclin B1                                                                                            | 0.75                                          | 0.44                                          | 1.90                                           | 1.97                                           | 2.93                                            |
| CENPA            | centromere protein A                                                                                 | 0.88                                          | 0.97                                          | 2.04                                           | 2.41                                           | 2.90                                            |
| NEK2             | NIMA (never in mitosis gene a)-related kinase 2                                                      | 0.98                                          | 0.82                                          | 1.96                                           | 2.40                                           | 2.86                                            |
| CCNB2            | cyclin B2                                                                                            | 0.56                                          | 0.48                                          | 0.98                                           | 1.47                                           | 2.81                                            |
| IPO7             | importin 7                                                                                           | 0.12                                          | 0.10                                          | 0.27                                           | 0.04                                           | 2.78                                            |
| RACGAP1          | Rac GTPase activating protein 1                                                                      | 0.40                                          | 1.14                                          | 1.59                                           | 1.58                                           | 2.26                                            |
| SPAG5            | sperm associated antigen 5                                                                           | 0.35                                          | 0.95                                          | 1.63                                           | 2.08                                           | 2.75                                            |
| ZWINT            | ZW10 interactor                                                                                      | -0.44                                         | 1.29                                          | 2.56                                           | 2.30                                           | 2.70                                            |
| KIF11            | kinesin family member 11                                                                             | 0.46                                          | 1.34                                          | 2.51                                           | 2.32                                           | 2.66                                            |
| AURKA            | aurora kinase A                                                                                      | 0.24                                          | 0.63                                          | 1.48                                           | 1.96                                           | 2.63                                            |
| C15ORF23         | chromosome 15 open reading frame 23                                                                  | 0.09                                          | 0.61                                          | 0.80                                           | 1.64                                           | 2.62                                            |
| BIRC5            | baculoviral IAP repeat-containing 5                                                                  | 0.54                                          | 0.74                                          | 1.29                                           | 1.92                                           | 2.62                                            |
| NCAPG            | non-SMC condensin I complex, subunit G                                                               | -0.48                                         | 1.24                                          | 1.67                                           | 1.63                                           | 2.61                                            |
| KIF2C            | kinesin family member 2C                                                                             | 0.08                                          | 0.48                                          | 1.81                                           | 1.91                                           | 2.59                                            |
| SGOL2            | shugoshin-like 2 ( <i>S. pombe</i> )                                                                 | 0.36                                          | 1.14                                          | 0.97                                           | 1.53                                           | 2.52                                            |
| TOP2A            | topoisomerase (DNA) II alpha 170 kDa                                                                 | 0.71                                          | 1.64                                          | 2.25                                           | 2.24                                           | 2.47                                            |
| PTTG1            | pituitary tumor-transforming 1                                                                       | 0.91                                          | 0.87                                          | 1.70                                           | 1.76                                           | 2.42                                            |
| NCAPH            | non-SMC condensin I complex, subunit H                                                               | -0.41                                         | 0.58                                          | 1.55                                           | 2.03                                           | 2.38                                            |
| KIAA0101         | KIAA0101                                                                                             | -0.37                                         | 1.86                                          | 1.61                                           | 2.13                                           | 2.35                                            |
| NEIL3            | nei endonuclease VIII-like 3 ( <i>E. coli</i> )                                                      | 0.15                                          | 1.57                                          | 2.67                                           | 1.93                                           | 2.33                                            |
| ENY2             | enhancer of yellow 2 homolog ( <i>Drosophila</i> )                                                   | 0.29                                          | 0.83                                          | 1.12                                           | 1.71                                           | 2.28                                            |
| PTTG2            | pituitary tumor-transforming 2                                                                       | 0.89                                          | 0.87                                          | 1.87                                           | 1.94                                           | 2.25                                            |
| CKS2             | CDC28 protein kinase regulatory subunit 2                                                            | 0.54                                          | 0.52                                          | 1.61                                           | 1.98                                           | 2.25                                            |
| ANLN             | anillin, actin binding protein                                                                       | 1.25                                          | 2.33                                          | 2.20                                           | 2.18                                           | 2.22                                            |
| PAICS            | phosphoribosylaminoimidazole carboxylase, phosphoribosylaminoimidazole succinocarboxamide synthetase | -0.14                                         | 0.75                                          | 0.93                                           | 0.97                                           | 2.17                                            |
| KPNA2            | karyopherin alpha 2 (RAG cohort 1, importin alpha 1)                                                 | 0.55                                          | 0.57                                          | 1.00                                           | 1.16                                           | 2.17                                            |
| SPC25            | SPC25, NDC80 kinetochore complex component, homolog ( <i>S. cerevisiae</i> )                         | -0.07                                         | 1.27                                          | 2.20                                           | 2.06                                           | 2.12                                            |
| PRC1             | protein regulator of cytokinesis 1                                                                   | 0.65                                          | 1.00                                          | 1.08                                           | 0.98                                           | 2.12                                            |
| NASP             | nuclear autoantigenic sperm protein (histone-binding)                                                | -0.09                                         | 0.80                                          | 1.57                                           | 1.54                                           | 2.10                                            |
